# Supplementary material for: Frequent FOXA1-Activating Mutations in Extramammary Paget’s Disease
Source: PubMed Central journal article supplement (PMC7226542; doi:10.3390/cancers12040820), 2020-03-29
Supplement: cancers-12-00820-s001.pdf [file cancers-12-00820-s001.pdf]

1 **Supplementary Information**

2

3 **Supplementary Figures** pp. 2–4

4 Figure S1. Validation of the genomic breakpoints involving *GAS6* and *FOXA1* in UPN1

5 Figure S2. Validation of the *FOXA1* g.38064406G>A mutation identified in UPN2

6 Figure S3. Additional gene set enrichment analyses

7

8 **Supplementary Tables** pp. 5–31

9 Table S1. Detailed clinical characteristics of each patient

10 Table S2. Genes and regions analyzed by targeted sequencing

11 Table S3. Nonsynonymous mutations identified by whole-genome sequencing

12 Table S4. Nonsynonymous mutations identified by whole-exome sequencing

13 Table S5. Summary of possible driver mutations identified in this study

14 Table S6. Top 200 differentially expressed genes

15

16

17 **Supplementary Figures**

18  
19 **Figure S1. Validation of the genomic breakpoints involving *GAS6* and *FOXA1* in UPN1**

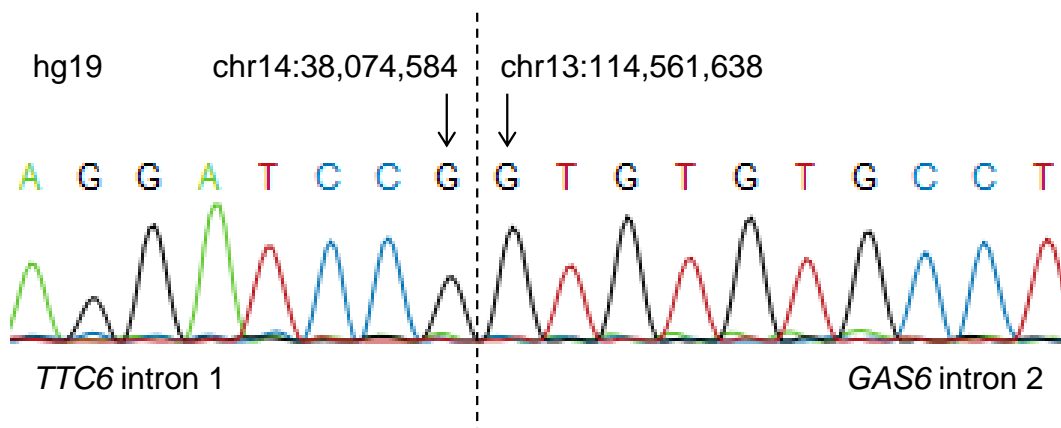

23 Sanger sequencing validating the structural variation identified in UPN1. The hg19 genome  
24 coordinate is used to represent the positions of the breakpoint.

25

26

27 **Figure S2. Validation of the *FOXA1* g.38064406G>A mutation identified in UPN2**

28

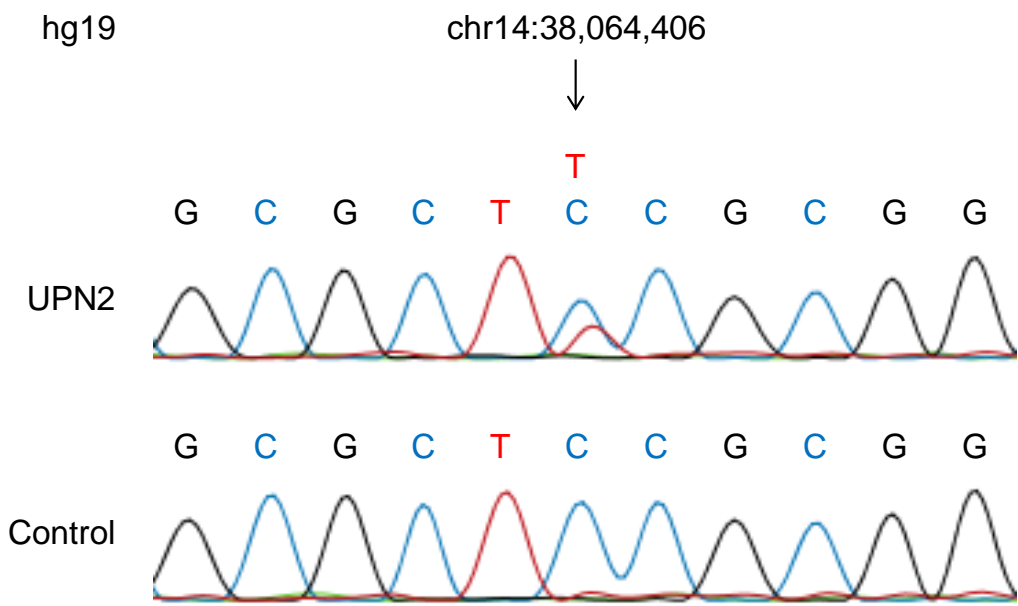

29

30

31 Sanger sequencing validating the presence of C>T (G>A) nucleotide alteration at 38,064,406 on  
32 chromosome 14.

33

34

Figure S3. Additional gene set enrichment analyses

A

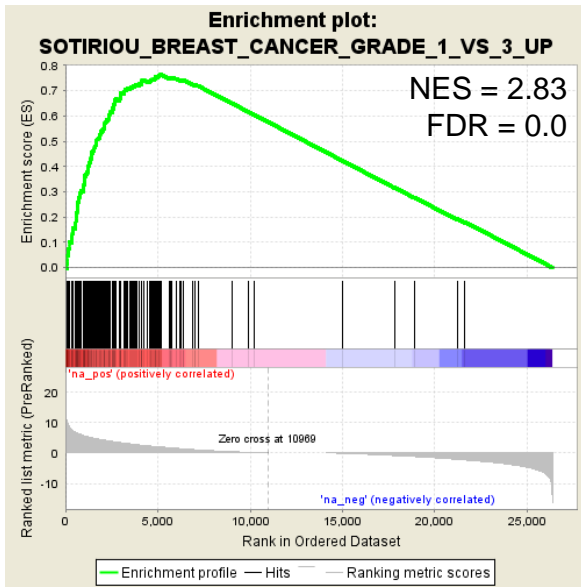

B

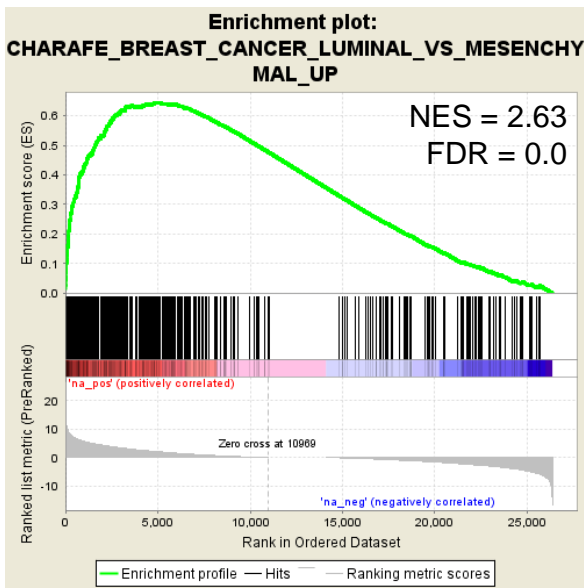

37 Enrichment plots showing the upregulation of genes associated with (A) high-grade breast cancer

38 (SOTIRIOU\_BREAST\_CANCER\_GRADE\_1\_VS\_3\_UP, the most significantly enriched in the C2

39 gene set database) and (B) luminal breast cancer

40 (CHARAFE\_BREAST\_CANCER\_LUMINAL\_VS\_MESENCHYMAL\_UP, the fourth most

41 significantly enriched). NES, normalized enrichment score; FDR, false discovery rate.

**Table S1. Detailed clinical characteristics of each patient**

| UPN | Age / gender | Age at onset | Primary location | Dermal invasion | Metastasis of SLN | Frozen / FFPE | Analysis    | FOXA1 expression | ER expression |
|-----|--------------|--------------|------------------|-----------------|-------------------|---------------|-------------|------------------|---------------|
| 1   | 55 / F       | 53           | Perineal         | <i>In situ</i>  | -                 | Frozen        | WGS/RNA/TGS | +                | +             |
| 2   | 70 / M       | 68           | Penoscrotal      | Invasive        | -                 | Frozen        | WGS/RNA/TGS | +                | +             |
| 3   | 73 / F       | 72           | Perineal         | <i>In situ</i>  | -                 | Frozen        | RNA/TGS     | +                | +             |
| 4   | 65 / F       | 64           | Perineal         | Invasive        | -                 | Frozen        | TGS         | +                | +             |
| 5   | 89 / M       | 88           | Penoscrotal      | Invasive        | +                 | Frozen        | RNA/TGS     | +                | +             |
| 6   | 76 / F       | 75           | Perineal         | Invasive        | -                 | Frozen        | RNA/TGS     | +                | +             |
| 7   | 71 / F       | 68           | Perineal         | <i>In situ</i>  | -                 | Frozen        | RNA/TGS     | +                | +             |
| 8   | 79 / M       | 78           | Penoscrotal      | Invasive        | -                 | Frozen        | RNA/TGS     | +                | +             |
| 9   | 58 / M       | 53           | Penoscrotal      | Invasive        | -                 | Frozen        | RNA/TGS     | +                | NA            |
| 10  | 66 / M       | 65           | Penoscrotal      | <i>In situ</i>  | -                 | Frozen        | TGS         | +                | +             |
| 11  | 72 / M       | 67           | Penoscrotal      | Invasive        | +                 | FFPE          | WES/TGS     | +                | +             |
| 12  | 80 / M       | 79           | Penoscrotal      | <i>In situ</i>  | -                 | FFPE          | WES/TGS     | +                | +             |
| 13  | 60 / M       | 59           | Penoscrotal      | Invasive        | +                 | FFPE          | WES/TGS     | +                | +             |
| 14  | 67 / M       | 64           | Inguinal         | Invasive        | +                 | FFPE          | WES/TGS     | +                | -             |
| 15  | 70 / M       | 70           | Perineal         | Invasive        | -                 | FFPE          | WES/TGS     | +                | -             |
| 16  | 73 / F       | 70           | Perineal         | <i>In situ</i>  | -                 | FFPE          | WES/TGS     | +                | -             |
| 17  | 88 / F       | 84           | Perineal         | <i>In situ</i>  | -                 | FFPE          | WES/TGS     | +                | +             |
| 18  | 80 / F       | 79           | Perineal         | <i>In situ</i>  | -                 | FFPE          | WES/TGS     | +                | -             |
| 19  | 82 / F       | 79           | Perineal         | Invasive        | -                 | FFPE          | WES/TGS     | +                | -             |
| 20  | 72 / M       | 69           | Perineal         | Invasive        | -                 | FFPE          | WES/TGS     | +                | -             |
| 21  | 69 / F       | 65           | Perineal         | <i>In situ</i>  | -                 | FFPE          | WES/TGS     | +                | +             |
| 22  | 78 / M       | 75           | Penoscrotal      | Invasive        | -                 | FFPE          | TGS         | +                | +             |
| 23  | 82 / M       | 81           | Penoscrotal      | Invasive        | -                 | FFPE          | TGS         | +                | ++            |
| 24  | 90 / F       | 83           | Perineal         | <i>In situ</i>  | NA                | FFPE          | TGS         | +                | +             |
| 25  | 65 / M       | 57           | Penoscrotal      | <i>In situ</i>  | NA                | FFPE          | TGS         | +                | +             |
| 26  | 76 / M       | 76           | Penoscrotal      | <i>In situ</i>  | NA                | FFPE          | TGS         | +                | -             |
| 27  | 64 / F       | 58           | Perineal         | <i>In situ</i>  | -                 | FFPE          | TGS         | +                | ++            |
| 28  | 62 / M       | 59           | Penoscrotal      | Invasive        | -                 | FFPE          | TGS         | +                | +             |
| 29  | 85 / M       | 84           | Penoscrotal      | Invasive        | NA                | FFPE          | TGS         | +                | -             |
| 30  | 74 / F       | 66           | Axillary         | <i>In situ</i>  | NA                | FFPE          | TGS         | +                | +             |
| 31  | 73 / M       | 68           | Penoscrotal      | <i>In situ</i>  | NA                | FFPE          | TGS         | +                | -             |
| 32  | 81 / M       | 80           | Penoscrotal      | Invasive        | -                 | FFPE          | TGS         | +                | -             |
| 33  | 71 / M       | 61           | Penoscrotal      | Invasive        | NA                | FFPE          | TGS         | +                | +             |
| 34  | 78 / M       | 77           | Penoscrotal      | Invasive        | NA                | FFPE          | TGS         | +                | ++            |
| 35  | 92 / F       | NA           | Perineal         | Invasive        | NA                | FFPE          | TGS         | +                | +             |
| 36  | 87 / F       | NA           | Axillary         | <i>In situ</i>  | NA                | FFPE          | TGS         | +                | ++            |
| 37  | 64 / M       | 61           | Penoscrotal      | <i>In situ</i>  | NA                | FFPE          | TGS         | +                | ++            |
| 38  | 83 / M       | NA           | Penoscrotal      | <i>In situ</i>  | NA                | FFPE          | TGS         | +                | +             |

|    |      |    |             |                |   |        |         |    |    |
|----|------|----|-------------|----------------|---|--------|---------|----|----|
| 39 | 77/M | 77 | Penoscrotal | Invasive       | - | Frozen | WES/TGS | NA | NA |
| 40 | 57/F | 54 | Vulval      | <i>In situ</i> | - | Frozen | WES/TGS | +  | -  |
| 41 | 78/F | 78 | Perianal    | <i>In situ</i> | - | Frozen | WES/TGS | +  | -  |
| 42 | 77/M | 76 | Perianal    | <i>In situ</i> | - | Frozen | WES/TGS | +  | +  |
| 43 | 59/M | 53 | Penoscrotal | Invasive       | - | Frozen | WES/TGS | +  | -  |
| 44 | 68/F | 67 | Perianal    | <i>In situ</i> | - | Frozen | WES/TGS | +  | -  |
| 45 | 69/M | 64 | Mons pubis  | Invasive       | - | Frozen | WES/TGS | +  | -  |
| 46 | 75/M | 74 | Inguinal    | Invasive       | + | Frozen | WES/TGS | +  | +  |
| 47 | 74/M | 74 | Penoscrotal | <i>In situ</i> | - | Frozen | WES/TGS | +  | +  |
| 48 | 71/M | 71 | Inguinal    | <i>In situ</i> | - | Frozen | WES/TGS | +  | -  |

44 SLN, sentinel lymph node: FFPE, formalin-fixed paraffin-embedded; ER, estrogen receptor; WGS,  
45 whole-genome sequencing; RNA, RNA sequencing; TGS, targeted gene sequencing; WES,  
46 whole-exome sequencing; NA, not available

**Table S2. Genes and regions analyzed by targeted sequencing**

| Genes (coding regions + 25 bp targeted) |                   |                  |                  |                  |                  |                  |                  |
|-----------------------------------------|-------------------|------------------|------------------|------------------|------------------|------------------|------------------|
| <i>ABCB1</i>                            | <i>ABCC2</i>      | <i>ABL1</i>      | <i>ABL2</i>      | <i>ACO1</i>      | <i>ACOX1</i>     | <i>ACRC</i>      | <i>ACTG1</i>     |
| <i>ACVR1B</i>                           | <i>ADAM28</i>     | <i>ADGRB3</i>    | <i>ADIPOR1</i>   | <i>AGAP2</i>     | <i>AHNAK</i>     | <i>AIM1</i>      | <i>AK2</i>       |
| <i>AKT1</i>                             | <i>AKT2</i>       | <i>AKT3</i>      | <i>ALDH1B1</i>   | <i>ALK</i>       | <i>ALPK2</i>     | <i>ANK3</i>      | <i>ANTXR1</i>    |
| <i>APC</i>                              | <i>AQP7</i>       | <i>ARHGEF16</i>  | <i>ARID1A</i>    | <i>ARID2</i>     | <i>ARMCX4</i>    | <i>ASXL1</i>     | <i>ATM</i>       |
| <i>ATN1</i>                             | <i>ATP1A1</i>     | <i>ATP6V0C</i>   | <i>ATP8A1</i>    | <i>ATP8B2</i>    | <i>ATRX</i>      | <i>BAHD1</i>     | <i>BCL11A</i>    |
| <i>BCLAF1</i>                           | <i>BRAF</i>       | <i>BRCA1</i>     | <i>BRCA2</i>     | <i>BRD4</i>      | <i>C11orf30</i>  | <i>C11orf80</i>  | <i>C14orf159</i> |
| <i>C16orf82</i>                         | <i>C16orf89</i>   | <i>C1orf127</i>  | <i>C1QL1</i>     | <i>C8orf44</i>   | <i>CACNA1C</i>   | <i>CAMTA1</i>    | <i>CASC5</i>     |
| <i>CASP8</i>                            | <i>CAST</i>       | <i>CBFB</i>      | <i>CBL</i>       | <i>CCDC116</i>   | <i>CCDC148</i>   | <i>CCDC40</i>    | <i>CDA</i>       |
| <i>CDC42BPA</i>                         | <i>CDH1</i>       | <i>CDK20</i>     | <i>CDK4</i>      | <i>CDKAL1</i>    | <i>CDKN1B</i>    | <i>CDKN2A</i>    | <i>CDKN2B</i>    |
| <i>CEBPA</i>                            | <i>CFAP221</i>    | <i>CHD2</i>      | <i>CHD7</i>      | <i>CHGB</i>      | <i>CHIC2</i>     | <i>CHRM5</i>     | <i>CLCN3</i>     |
| <i>CLPS</i>                             | <i>CNNM4</i>      | <i>COBLL1</i>    | <i>CREBBP</i>    | <i>CRLF2</i>     | <i>CROT</i>      | <i>CRY1</i>      | <i>CRY2</i>      |
| <i>CRYBA4</i>                           | <i>CSF1R</i>      | <i>CTCF</i>      | <i>CTNNB1</i>    | <i>CTNND2</i>    | <i>CUL4B</i>     | <i>CYB561D1</i>  | <i>CYGB</i>      |
| <i>CYP19A1</i>                          | <i>CYP26B1</i>    | <i>CYP27B1</i>   | <i>CYP2A6</i>    | <i>CYP2B6</i>    | <i>CYP2C19</i>   | <i>CYP2C9</i>    | <i>CYP2D6</i>    |
| <i>CYP2E1</i>                           | <i>DCAF10</i>     | <i>DDR1</i>      | <i>DDR2</i>      | <i>DDX3X</i>     | <i>DDX53</i>     | <i>DGKD</i>      | <i>DHPS</i>      |
| <i>DHX32</i>                            | <i>DHX38</i>      | <i>DLC1</i>      | <i>DNMT1</i>     | <i>DNMT3A</i>    | <i>DPCR1</i>     | <i>DPYD</i>      | <i>DST</i>       |
| <i>DUSP14</i>                           | <i>DUSP4</i>      | <i>DYNAP</i>     | <i>EGFL6</i>     | <i>EGFR</i>      | <i>ELOVL2</i>    | <i>EP300</i>     | <i>EPHA7</i>     |
| <i>EPPK1</i>                            | <i>ERBB2</i>      | <i>ERBB3</i>     | <i>ERBB4</i>     | <i>ERG</i>       | <i>ERP29</i>     | <i>ERRFI1</i>    | <i>ESR1</i>      |
| <i>ESR2</i>                             | <i>EYA1</i>       | <i>EZH2</i>      | <i>FAM208A</i>   | <i>FANCD2</i>    | <i>FAT1</i>      | <i>FBXW7</i>     | <i>FDXACB1</i>   |
| <i>FGFR1</i>                            | <i>FGFR2</i>      | <i>FGFR3</i>     | <i>FGFR4</i>     | <i>FITM1</i>     | <i>FLG</i>       | <i>FLNB</i>      | <i>FLT1</i>      |
| <i>FLT3</i>                             | <i>FLT4</i>       | <i>FRMD7</i>     | <i>FRYL</i>      | <i>FSTL5</i>     | <i>FUT7</i>      | <i>GATA3</i>     | <i>GLIS3</i>     |
| <i>GLUD1</i>                            | <i>GNA11</i>      | <i>GNAQ</i>      | <i>GNAS</i>      | <i>GNE</i>       | <i>GNPTAB</i>    | <i>GPC5</i>      | <i>GPR116</i>    |
| <i>GPR179</i>                           | <i>GPRC6A</i>     | <i>GRHL2</i>     | <i>GSTP1</i>     | <i>GTPBP4</i>    | <i>H3F3A</i>     | <i>H3F3B</i>     | <i>HDAC9</i>     |
| <i>HECTD4</i>                           | <i>HIST1H1A</i>   | <i>HIST1H1B</i>  | <i>HIST1H1C</i>  | <i>HIST1H1D</i>  | <i>HIST1H1E</i>  | <i>HIST1H1T</i>  | <i>HIST1H2AA</i> |
| <i>HIST1H2AB</i>                        | <i>HIST1H2AC</i>  | <i>HIST1H2AD</i> | <i>HIST1H2AE</i> | <i>HIST1H2AG</i> | <i>HIST1H2AH</i> | <i>HIST1H2AI</i> | <i>HIST1H2AJ</i> |
| <i>HIST1H2AK</i>                        | <i>HIST1H2AL</i>  | <i>HIST1H2AM</i> | <i>HIST1H2BA</i> | <i>HIST1H2BB</i> | <i>HIST1H2BC</i> | <i>HIST1H2BD</i> | <i>HIST1H2BE</i> |
| <i>HIST1H2BF</i>                        | <i>HIST1H2BG</i>  | <i>HIST1H2BH</i> | <i>HIST1H2BI</i> | <i>HIST1H2BJ</i> | <i>HIST1H2BK</i> | <i>HIST1H2BL</i> | <i>HIST1H2BM</i> |
| <i>HIST1H2BN</i>                        | <i>HIST1H2BO</i>  | <i>HIST1H3A</i>  | <i>HIST1H3B</i>  | <i>HIST1H3C</i>  | <i>HIST1H3D</i>  | <i>HIST1H3E</i>  | <i>HIST1H3F</i>  |
| <i>HIST1H3G</i>                         | <i>HIST1H3H</i>   | <i>HIST1H3I</i>  | <i>HIST1H3J</i>  | <i>HIST1H4A</i>  | <i>HIST1H4B</i>  | <i>HIST1H4C</i>  | <i>HIST1H4D</i>  |
| <i>HIST1H4E</i>                         | <i>HIST1H4F</i>   | <i>HIST1H4G</i>  | <i>HIST1H4H</i>  | <i>HIST1H4I</i>  | <i>HIST1H4J</i>  | <i>HIST1H4K</i>  | <i>HIST1H4L</i>  |
| <i>HIST2H2AA3</i>                       | <i>HIST2H2AA4</i> | <i>HIST2H2AB</i> | <i>HIST2H2AC</i> | <i>HIST2H2BE</i> | <i>HIST2H2BF</i> | <i>HIST2H3A</i>  | <i>HIST2H3C</i>  |
| <i>HIST2H3D</i>                         | <i>HIST2H4A</i>   | <i>HIST2H4B</i>  | <i>HIST3H2A</i>  | <i>HIST3H2BB</i> | <i>HIST3H3</i>   | <i>HIST4H4</i>   | <i>HLA-B</i>     |
| <i>HMCN1</i>                            | <i>HNF1A</i>      | <i>HOXA3</i>     | <i>HPS5</i>      | <i>HRAS</i>      | <i>HRNR</i>      | <i>HSPG2</i>     | <i>IDH1</i>      |
| <i>IDH2</i>                             | <i>IDI1</i>       | <i>IGSF10</i>    | <i>IGSF22</i>    | <i>IKZF1</i>     | <i>IL1RN</i>     | <i>IL2RA</i>     | <i>IL2RB</i>     |
| <i>IL2RG</i>                            | <i>IL6ST</i>      | <i>ILKAP</i>     | <i>INO80D</i>    | <i>INPP4B</i>    | <i>IQSEC1</i>    | <i>ITGAV</i>     | <i>JAG2</i>      |
| <i>JAK1</i>                             | <i>JAK2</i>       | <i>JAK3</i>      | <i>JARID2</i>    | <i>JMJD6</i>     | <i>KALRN</i>     | <i>KANK2</i>     | <i>KDM1A</i>     |
| <i>KDM6A</i>                            | <i>KDM7A</i>      | <i>KDR</i>       | <i>KIAA0391</i>  | <i>KIT</i>       | <i>KMT2A</i>     | <i>KMT2C</i>     | <i>KNG1</i>      |
| <i>KRAS</i>                             | <i>KRTAP10-2</i>  | <i>KRTAP4-11</i> | <i>KSR2</i>      | <i>LAMA2</i>     | <i>LAMC1</i>     | <i>LCK</i>       | <i>LCLAT1</i>    |
| <i>LCTL</i>                             | <i>LILRB5</i>     | <i>LMTK3</i>     | <i>LOXL4</i>     | <i>LRCH2</i>     | <i>LRP6</i>      | <i>LRR1</i>      | <i>LTK</i>       |
| <i>MACF1</i>                            | <i>MAP2K1</i>     | <i>MAP2K2</i>    | <i>MAP2K4</i>    | <i>MAP3K1</i>    | <i>MAPK1</i>     | <i>MED13</i>     | <i>MED23</i>     |

|                |                |                |                 |                 |                |                 |                |
|----------------|----------------|----------------|-----------------|-----------------|----------------|-----------------|----------------|
| <i>MED24</i>   | <i>MET</i>     | <i>MGA</i>     | <i>MGAM2</i>    | <i>MLH1</i>     | <i>MOV10L1</i> | <i>MPL</i>      | <i>MRT04</i>   |
| <i>MST1R</i>   | <i>MTOR</i>    | <i>MTR</i>     | <i>MUC4</i>     | <i>MXRA5</i>    | <i>MYB</i>     | <i>MYC</i>      | <i>MYD88</i>   |
| <i>MYOCD</i>   | <i>MYRF</i>    | <i>NACA</i>    | <i>NACC2</i>    | <i>NADK</i>     | <i>NBPF10</i>  | <i>NCOR1</i>    | <i>NEFH</i>    |
| <i>NELL2</i>   | <i>NF1</i>     | <i>NIM1K</i>   | <i>NLRP8</i>    | <i>NME2</i>     | <i>NOTCH1</i>  | <i>NOTCH2</i>   | <i>NPIPA5</i>  |
| <i>NPIPB15</i> | <i>NPIPB5</i>  | <i>NPM1</i>    | <i>NRAS</i>     | <i>OGDH</i>     | <i>OPCML</i>   | <i>OR4A16</i>   | <i>OR52N1</i>  |
| <i>PABPC1</i>  | <i>PAGE1</i>   | <i>PANX2</i>   | <i>PCDHA9</i>   | <i>PCDHB4</i>   | <i>PCNX</i>    | <i>PCSK1</i>    | <i>PCSK6</i>   |
| <i>PDGFRA</i>  | <i>PDGFRB</i>  | <i>PDK1</i>    | <i>PDZD8</i>    | <i>PHF6</i>     | <i>PIGN</i>    | <i>PIK3C2A</i>  | <i>PIK3CA</i>  |
| <i>PIK3R1</i>  | <i>PITPNC1</i> | <i>PLA2G6</i>  | <i>PLCL1</i>    | <i>PLIN4</i>    | <i>PLXDC2</i>  | <i>PLXNA4</i>   | <i>POTEG</i>   |
| <i>PPFIBP1</i> | <i>PPP6C</i>   | <i>PRUNE2</i>  | <i>PSMB1</i>    | <i>PSMB2</i>    | <i>PSMB5</i>   | <i>PSMD1</i>    | <i>PSMD2</i>   |
| <i>PTCH1</i>   | <i>PTEN</i>    | <i>PTGFRN</i>  | <i>PTPN11</i>   | <i>PTPRF</i>    | <i>RAB40A</i>  | <i>RAC1</i>     | <i>RAF1</i>    |
| <i>RARA</i>    | <i>RARB</i>    | <i>RARG</i>    | <i>RB1</i>      | <i>RET</i>      | <i>RNASE1</i>  | <i>RNF43</i>    | <i>ROCK2</i>   |
| <i>ROR1</i>    | <i>ROS1</i>    | <i>RPS6KB1</i> | <i>RRP9</i>     | <i>RUNX1</i>    | <i>RXRA</i>    | <i>RXRB</i>     | <i>RXRG</i>    |
| <i>SACS</i>    | <i>SCN2A</i>   | <i>SCP2</i>    | <i>SCRT1</i>    | <i>SDHB</i>     | <i>SEC31A</i>  | <i>SERPINB3</i> | <i>SETDB1</i>  |
| <i>SF3B1</i>   | <i>SHH</i>     | <i>SHOC2</i>   | <i>SLC12A8</i>  | <i>SLC22A1</i>  | <i>SLC22A2</i> | <i>SLC2A1</i>   | <i>SLC31A1</i> |
| <i>SLC34A2</i> | <i>SLC44A4</i> | <i>SLC45A3</i> | <i>SLC4A1AP</i> | <i>SLC4A7</i>   | <i>SLC6A1</i>  | <i>SLCO1B1</i>  | <i>SLCO1B3</i> |
| <i>SMAD4</i>   | <i>SMARCA4</i> | <i>SMARCB1</i> | <i>SMC5</i>     | <i>SMG1</i>     | <i>SMO</i>     | <i>SMPD4</i>    | <i>SNCAIP</i>  |
| <i>SNX31</i>   | <i>SOD2</i>    | <i>SOGA1</i>   | <i>SOS1</i>     | <i>SPDYE1</i>   | <i>SPEN</i>    | <i>SPG11</i>    | <i>SPRED1</i>  |
| <i>SPTAN1</i>  | <i>SRC</i>     | <i>STAG2</i>   | <i>STARD13</i>  | <i>STK11</i>    | <i>STK19</i>   | <i>SUFU</i>     | <i>SYNE1</i>   |
| <i>TANC1</i>   | <i>TAS2R38</i> | <i>TBL1XR1</i> | <i>TBX3</i>     | <i>TBXA2R</i>   | <i>TCEB3C</i>  | <i>TCEB3CL</i>  | <i>TEKT4</i>   |
| <i>TET2</i>    | <i>TIAL1</i>   | <i>TM9SF2</i>  | <i>TMEM51</i>   | <i>TNFRSF25</i> | <i>TP53</i>    | <i>TRIO</i>     | <i>TRPV4</i>   |
| <i>TRRAP</i>   | <i>TSHZ3</i>   | <i>TTC22</i>   | <i>TUBA3E</i>   | <i>TXNRD1</i>   | <i>TYK2</i>    | <i>UBE3B</i>    | <i>UBE4A</i>   |
| <i>UBTD2</i>   | <i>UGT1A1</i>  | <i>UGT2B11</i> | <i>UNC13A</i>   | <i>UQCRFS1</i>  | <i>USP19</i>   | <i>USP4</i>     | <i>USP6NL</i>  |
| <i>VHL</i>     | <i>VPS41</i>   | <i>WASF3</i>   | <i>WHSC1</i>    | <i>WT1</i>      | <i>WWP1</i>    | <i>XIRP2</i>    | <i>YES1</i>    |
| <i>YIPF1</i>   | <i>ZC3H7A</i>  | <i>ZKSCAN2</i> | <i>ZMYM3</i>    | <i>ZMYM4</i>    | <i>ZNF141</i>  | <i>ZNF195</i>   | <i>ZNF208</i>  |
| <i>ZNF217</i>  | <i>ZNF236</i>  | <i>ZNF285</i>  | <i>ZNF429</i>   | <i>ZNF479</i>   | <i>ZNF528</i>  | <i>ZNF534</i>   | <i>ZNF587B</i> |
| <i>ZNF611</i>  | <i>ZNF676</i>  | <i>ZNF727</i>  | <i>ZNF728</i>   | <i>ZNF729</i>   | <i>ZNF735</i>  | <i>ZNF750</i>   | <i>ZNF765</i>  |
| <i>ZNF816</i>  | <i>ZNF85</i>   | <i>ZSWIM8</i>  |                 |                 |                |                 |                |

---

Regions

Whole UTR/exon/intron of *GAS6* (chr13:113819854-113864930 @ hg38, 44 kb)

Whole UTR/exon/intron of *FOXA1* and 200-kb upstream (chr14:37585355-37843301 @ hg38, 256 kb)

---

51 UTR, untranslated region

52

53



**Table S3. Nonsynonymous mutations identified by whole-genome sequencing**

| UPN | Gene                | Reference    | Nucleic acid change    | Amino acid change | VAF  | ClinVar | COSMIC |
|-----|---------------------|--------------|------------------------|-------------------|------|---------|--------|
| 1   | <i>ADAM11</i>       | NM_002390    | c.826-2A>C             | (exon 11)         | 0.12 | -       | -      |
| 1   | <i>AHNAK2</i>       | NM_138420    | c.6181G>C              | p.V2061L          | 0.16 | -       | -      |
| 1   | <i>BEAN1</i>        | NM_001178020 | c.244_245insTTTTTTAATG | p.H82Lfs*3        | 0.10 | -       | -      |
| 1   | <i>CALML6</i>       | NM_138705    | c.433G>A               | p.E145K           | 0.10 | -       | -      |
| 1   | <i>CCDC141</i>      | NM_173648    | c.4018G>T              | p.G1340C          | 0.10 | -       | -      |
| 1   | <i>CNOT1</i>        | NM_206999    | c.4635A>T              | p.L1545F          | 0.10 | -       | -      |
| 1   | <i>CORIN</i>        | NM_006587    | c.618-3T>-             | (exon 5)          | 0.11 | -       | -      |
| 1   | <i>CORO2B</i>       | NM_006091    | c.881A>G               | p.N294S           | 0.11 | -       | -      |
| 1   | <i>EMX1</i>         | NM_004097    | c.241A>C               | p.T81P            | 0.11 | -       | -      |
| 1   | <i>F10</i>          | NM_000504    | c.626A>C               | p.D209A           | 0.15 | -       | -      |
| 1   | <i>FAM47C</i>       | NM_001013736 | c.1373G>A              | p.R458Q           | 0.10 | -       | -      |
| 1   | <i>G2E3</i>         | NM_017769    | c.1393G>T              | p.G465C           | 0.11 | -       | -      |
| 1   | <i>IQSEC2</i>       | NM_001111125 | c.3574T>G              | p.Y1192D          | 0.18 | -       | -      |
| 1   | <i>LLGL2</i>        | NM_004524    | c.1732C>T              | p.Q578*           | 0.12 | -       | -      |
| 1   | <i>LOC100129520</i> | NM_001195272 | c.1148C>T              | p.P383L           | 0.12 | -       | -      |
| 1   | <i>MDK</i>          | NM_002391    | c.406+2T>G             | (exon 4)          | 0.16 | -       | -      |
| 1   | <i>MUC2</i>         | NM_002457    | c.4370C>T              | p.P1457L          | 0.08 | -       | -      |
| 1   | <i>MYBPC1</i>       | NM_206820    | c.2290G>T              | p.A764S           | 0.07 | -       | -      |
| 1   | <i>MYCBP2</i>       | NM_015057    | c.2434A>C              | p.K812Q           | 0.16 | -       | -      |
| 1   | <i>NFATC3</i>       | NM_004555    | c.91T>G                | p.S31A            | 0.14 | -       | -      |
| 1   | <i>NOS2</i>         | NM_000625    | c.2081T>C              | p.I694T           | 0.10 | -       | -      |
| 1   | <i>NRAS</i>         | NM_002524    | c.430A>C               | p.T144P           | 0.10 | -       | -      |
| 1   | <i>NUMB</i>         | NM_003744    | c.625G>A               | p.E209K           | 0.12 | -       | -      |
| 1   | <i>OBSCN</i>        | NM_052843    | c.11536T>C             | p.Y3846H          | 0.09 | -       | -      |
| 1   | <i>OR1L4</i>        | NM_001005235 | c.143T>C               | p.L48P            | 0.11 | -       | -      |
| 1   | <i>PAMR1</i>        | NM_015430    | c.509G>C               | p.S170T           | 0.07 | -       | -      |
| 1   | <i>PCM1</i>         | NM_006197    | c.1471C>A              | p.Q491K           | 0.08 | -       | -      |
| 1   | <i>PDSS2</i>        | NM_020381    | c.94A>C                | p.I32L            | 0.13 | -       | -      |
| 1   | <i>PLCL1</i>        | NM_006226    | c.2161C>G              | p.L721V           | 0.11 | -       | -      |
| 1   | <i>PRAMEF1</i>      | NM_023013    | c.41G>T                | p.G14V            | 0.11 | -       | -      |
| 1   | <i>PRAMEF6</i>      | NM_001010889 | c.1211T>G              | p.I404R           | 0.15 | -       | -      |
| 1   | <i>PRAMEF6</i>      | NM_001010889 | c.1222T>A              | p.L408I           | 0.17 | -       | -      |
| 1   | <i>PTPRH</i>        | NM_002842    | c.2227C>T              | p.H743Y           | 0.14 | -       | -      |
| 1   | <i>PTPRQ</i>        | NM_001145026 | c.3368G>A              | p.G1123E          | 0.09 | -       | -      |
| 1   | <i>RIMS1</i>        | NM_014989    | c.2054T>C              | p.V685A           | 0.13 | -       | -      |
| 1   | <i>SEPT8</i>        | NM_015146    | c.528C>G               | p.D176E           | 0.10 | -       | -      |
| 1   | <i>SOX8</i>         | NM_014587    | c.982C>A               | p.P328T           | 0.15 | -       | -      |
| 1   | <i>STXBP5</i>       | NM_001127715 | c.2205G>T              | p.K735N           | 0.10 | -       | -      |
| 1   | <i>TMCO4</i>        | NM_181719    | c.856T>G               | p.W286G           | 0.12 | -       | -      |

|   |                  |              |                  |              |      |   |            |
|---|------------------|--------------|------------------|--------------|------|---|------------|
| 1 | <i>TRIM43</i>    | NM_138800    | c.1188_1189delAG | p.K398Tfs*10 | 0.14 | - | -          |
| 1 | <i>ZNF517</i>    | NM_213605    | c.1094A>C        | p.D365A      | 0.11 | - | -          |
| 2 | <i>ABCA10</i>    | NM_080282    | c.2456C>T        | p.P819L      | 0.18 | - | -          |
| 2 | <i>ADAMTS10</i>  | NM_030957    | c.457G>A         | p.E153K      | 0.19 | - | -          |
| 2 | <i>APOE</i>      | NM_000041    | c.371C>T         | p.A124V      | 0.29 | - | -          |
| 2 | <i>APOL5</i>     | NM_030642    | c.1141C>T        | p.L381F      | 0.23 | - | -          |
| 2 | <i>C10orf90</i>  | NM_001004298 | c.193G>C         | p.E65Q       | 0.20 | - | -          |
| 2 | <i>C14orf105</i> | NM_001283056 | c.653-4T>-       | (exon 6)     | 0.19 | - | -          |
| 2 | <i>CCDC168</i>   | NM_001146197 | c.8479G>C        | p.E2827Q     | 0.20 | - | -          |
| 2 | <i>CCT6A</i>     | NM_001762    | c.1065+1G>C      | (exon 9)     | 0.22 | - | -          |
| 2 | <i>CD300C</i>    | NM_006678    | c.494G>C         | p.R165T      | 0.22 | - | -          |
| 2 | <i>CFAP54</i>    | NM_001306084 | c.387G>C         | p.K129N      | 0.36 | - | -          |
| 2 | <i>CRYBG3</i>    | NM_153605    | c.5167G>A        | p.E1723K     | 0.36 | - | -          |
| 2 | <i>DST</i>       | NM_001144769 | c.170C>T         | p.S57L       | 0.15 | - | -          |
| 2 | <i>EQTN</i>      | NM_020641    | c.280C>G         | p.L94V       | 0.41 | - | -          |
| 2 | <i>FAM129B</i>   | NM_022833    | c.587A>G         | p.N196S      | 0.16 | - | -          |
| 2 | <i>FASN</i>      | NM_004104    | c.1771G>A        | p.D591N      | 0.26 | - | -          |
| 2 | <i>FASTK</i>     | NM_006712    | c.1039+4C>G      | (exon 5)     | 0.23 | - | -          |
| 2 | <i>FCAR</i>      | NM_002000    | c.460G>C         | p.D154H      | 0.22 | - | -          |
| 2 | <i>FOXA1</i>     | NM_001310135 | g.38064406G>A    | -            | 0.20 | - | -          |
| 2 | <i>FREM3</i>     | NM_001168235 | c.4063C>A        | p.L1355I     | 0.25 | - | -          |
| 2 | <i>FUT9</i>      | NM_006581    | c.68T>C          | p.M23T       | 0.15 | - | -          |
| 2 | <i>GGT1</i>      | NM_013421    | c.1673C>T        | p.S558L      | 0.13 | - | -          |
| 2 | <i>GLDN</i>      | NM_181789    | c.295G>A         | p.E99K       | 0.28 | - | -          |
| 2 | <i>GUCY1B3</i>   | NM_000857    | c.565G>C         | p.E189Q      | 0.25 | - | -          |
| 2 | <i>HDGFRP3</i>   | NM_016073    | c.607-5T>-       | (exon 6)     | 0.23 | - | -          |
| 2 | <i>HIST1H2BC</i> | NM_003526    | c.72G>C          | p.K24N       | 0.25 | - | -          |
| 2 | <i>HORMAD1</i>   | NM_032132    | c.872-5T>-       | (exon 12)    | 0.34 | - | -          |
| 2 | <i>INTS7</i>     | NM_015434    | c.1816-5->T      | (exon 14)    | 0.21 | - | -          |
| 2 | <i>LAMA2</i>     | NM_000426    | c.6307G>C        | p.E2103Q     | 0.17 | - | -          |
| 2 | <i>MOCS1</i>     | NM_005943    | c.250+3G>A       | (exon 1)     | 0.24 | - | -          |
| 2 | <i>MUC12</i>     | NM_001164462 | c.994C>A         | p.P332T      | 0.20 | - | -          |
| 2 | <i>MUM1</i>      | NM_032853    | c.2020G>A        | p.E674K      | 0.20 | - | -          |
| 2 | <i>MYPOP</i>     | NM_001012643 | c.337G>C         | p.E113Q      | 0.22 | - | -          |
| 2 | <i>NDUFS5</i>    | NM_004552    | c.70G>A          | p.E24K       | 0.25 | - | -          |
| 2 | <i>NFATC4</i>    | NM_001288802 | c.61G>C          | p.E21Q       | 0.18 | - | -          |
| 2 | <i>NMRK2</i>     | NM_170678    | c.436G>A         | p.D146N      | 0.24 | - | -          |
| 2 | <i>NOTCH1</i>    | NM_017617    | c.1904-3C>A      | (exon 12)    | 0.18 | - | -          |
| 2 | <i>NR4A3</i>     | NM_006981    | c.1299T>G        | p.H433Q      | 0.22 | - | -          |
| 2 | <i>NRIP1</i>     | NM_003489    | c.2650C>A        | p.H884N      | 0.33 | - | -          |
| 2 | <i>PEAR1</i>     | NM_001080471 | c.133C>T         | p.R45C       | 0.16 | - | -          |
| 2 | <i>PIK3CA</i>    | NM_006218    | c.241G>A         | p.E81K       | 0.21 | - | COSM271871 |

|   |                 |              |                 |              |      |   |   |
|---|-----------------|--------------|-----------------|--------------|------|---|---|
| 2 | <i>POM121</i>   | NM_172020    | c.822delG       | p.K275Rfs*59 | 0.23 | - | - |
| 2 | <i>PRUNE2</i>   | NM_015225    | c.9051-3T>-     | (exon 16)    | 0.16 | - | - |
| 2 | <i>RGPD3</i>    | NM_001144013 | c.2107G>A       | p.E703K      | 0.30 | - | - |
| 2 | <i>RPTOR</i>    | NM_020761    | c.3670G>A       | p.D1224N     | 0.16 | - | - |
| 2 | <i>SALL1</i>    | NM_002968    | c.1763dupC      | p.G589Rfs*6  | 0.26 | - | - |
| 2 | <i>SLC18A3</i>  | NM_003055    | c.770_772delTGT | p.L257del    | 0.20 | - | - |
| 2 | <i>SPATA13</i>  | NM_001166271 | c.755G>A        | p.S252N      | 0.25 | - | - |
| 2 | <i>SRL</i>      | NM_001098814 | c.530A>C        | p.E177A      | 0.36 | - | - |
| 2 | <i>SRSF10</i>   | NM_054016    | c.749G>A        | p.R250K      | 0.17 | - | - |
| 2 | <i>TAP1</i>     | NM_000593    | c.1039C>T       | p.R347W      | 0.31 | - | - |
| 2 | <i>THSD7A</i>   | NM_015204    | c.1630C>T       | p.R544C      | 0.27 | - | - |
| 2 | <i>TMEM182</i>  | NM_144632    | c.94C>G         | p.L32V       | 0.23 | - | - |
| 2 | <i>TMPRSS13</i> | NM_001077263 | c.1136G>A       | p.W379*      | 0.18 | - | - |
| 2 | <i>TNK2</i>     | NM_005781    | c.2121C>G       | p.F707L      | 0.22 | - | - |
| 2 | <i>TP53BP2</i>  | NM_005426    | c.1973C>G       | p.S658*      | 0.24 | - | - |
| 2 | <i>TRIOBP</i>   | NM_001039141 | c.31G>A         | p.E11K       | 0.21 | - | - |
| 2 | <i>UBR1</i>     | NM_174916    | c.463G>C        | p.E155Q      | 0.25 | - | - |
| 2 | <i>USE1</i>     | NM_018467    | c.232-1G>C      | (exon 4)     | 0.17 | - | - |
| 2 | <i>ZBED5</i>    | NM_021211    | c.116T>C        | p.L39S       | 0.17 | - | - |
| 2 | <i>ZNF286B</i>  | NM_001145045 | c.1540C>G       | p.Q514E      | 0.15 | - | - |
| 2 | <i>ZNF292</i>   | NM_015021    | c.266G>A        | p.R89Q       | 0.24 | - | - |

55 VAF, variant allele frequency; COSMIC, Catalogue Of Somatic Mutations In Cancer

56

57

**Table S4. Nonsynonymous mutations identified by whole-exome sequencing**

| UP<br>N | Gene             | Reference        | Nucleic acid change | Amino acid change | VAF  | ClinVar | COSMIC          |
|---------|------------------|------------------|---------------------|-------------------|------|---------|-----------------|
| 12      | <i>CNNM4</i>     | NM_020184        | c.727C>T            | p.L243F           | 0.14 | -       | -               |
| 12      | <i>EPPK1</i>     | NM_031308        | c.2521T>C           | p.Y841H           | 0.07 | -       | -               |
| 12      | <i>ILKAP</i>     | NM_030768        | c.714+1G>A          | (exon 8)          | 0.21 | -       | -               |
| 12      | <i>INO80D</i>    | NM_017759        | c.1638delA          | p.K546Nfs*49      | 0.14 | -       | -               |
| 12      | <i>PANX2</i>     | NM_052839        | c.508G>A            | p.E170K           | 0.06 | -       | -               |
| 12      | <i>STARD13</i>   | NM_052851        | c.2032G>A           | p.V678I           | 0.07 | -       | -               |
| 12      | <i>TNFRSF25</i>  | NM_003790        | c.998C>T            | p.P333L           | 0.2  | -       | -               |
| 12      | <i>TUBA3E</i>    | NM_207312        | c.322T>C            | p.Y108H           | 0.05 | -       | -               |
| 13      | <i>KRTAP10-2</i> | NM_198693        | c.233C>T            | p.S78L            | 0.18 | -       | -               |
| 13      | <i>POTEG</i>     | NM_00100535<br>6 | c.35C>T             | p.S12F            | 0.14 | -       | -               |
| 14      | <i>ARHGEF16</i>  | NM_014448        | c.544G>A            | p.E182K           | 0.14 | -       | -               |
| 14      | <i>ARMCX4</i>    | NM_00125615<br>5 | c.3155C>A           | p.S1052Y          | 0.37 | -       | -               |
| 14      | <i>ATN1</i>      | NM_001940        | c.496C>A            | p.P166T           | 0.13 | -       | -               |
| 14      | <i>ATN1</i>      | NM_001940        | c.2558C>G           | p.S853C           | 0.24 | -       | -               |
| 14      | <i>BCL11A</i>    | NM_018014        | c.914C>T            | p.P305L           | 0.18 | -       | -               |
| 14      | <i>C16orf82</i>  | NM_00114554<br>5 | c.43G>C             | p.E15Q            | 0.24 | -       | -               |
| 14      | <i>C1orf127</i>  | NM_00117075<br>4 | c.1924G>A           | p.D642N           | 0.13 | -       | -               |
| 14      | <i>C1QL1</i>     | NM_006688        | c.478G>A            | p.D160N           | 0.26 | -       | -               |
| 14      | <i>CAMTA1</i>    | NM_015215        | c.1636G>C           | p.E546Q           | 0.26 | -       | -               |
| 14      | <i>CHD2</i>      | NM_001271        | c.3004G>T           | p.A1002S          | 0.17 | -       | COSM370682<br>7 |
| 14      | <i>CHRM5</i>     | NM_012125        | c.527G>A            | p.R176Q           | 0.17 | -       | -               |
| 14      | <i>COBLL1</i>    | NM_014900        | c.2462C>G           | p.S821C           | 0.13 | -       | -               |
| 14      | <i>CRYBA4</i>    | NM_001886        | c.74G>A             | p.R25Q            | 0.17 | -       | -               |
| 14      | <i>CYP27B1</i>   | NM_000785        | c.40C>T             | p.R14C            | 0.25 | -       | -               |
| 14      | <i>CYP2E1</i>    | NM_000773        | c.1478C>T           | p.S493L           | 0.2  | -       | -               |
| 14      | <i>DCAF10</i>    | NM_024345        | c.1172C>T           | p.S391L           | 0.25 | -       | -               |
| 14      | <i>DLC1</i>      | NM_006094        | c.2028C>A           | p.F676L           | 0.44 | -       | -               |
| 14      | <i>ELOVL2</i>    | NM_017770        | c.445C>T            | p.H149Y           | 0.2  | -       | -               |
| 14      | <i>EPHA7</i>     | NM_004440        | c.962C>A            | p.S321Y           | 0.15 | -       | -               |
| 14      | <i>EPPK1</i>     | NM_031308        | c.5620C>T           | p.R1874C          | 0.34 | -       | -               |
| 14      | <i>ERP29</i>     | NM_006817        | c.579G>C            | p.E193D           | 0.17 | -       | -               |
| 14      | <i>EYA1</i>      | NM_000503        | c.1318C>T           | p.R440W           | 0.16 | -       | -               |
| 14      | <i>FITM1</i>     | NM_203402        | c.196delT           | p.F66Lfs*24       | 0.2  | -       | -               |

|    |                  |                  |            |          |      |                  |                 |
|----|------------------|------------------|------------|----------|------|------------------|-----------------|
| 14 | <i>FLG</i>       | NM_002016        | c.9896G>C  | p.G3299A | 0.18 | -                | -               |
| 14 | <i>GLUD1</i>     | NM_005271        | c.283G>A   | p.E95K   | 0.28 | -                | -               |
| 14 | <i>GPC5</i>      | NM_004466        | c.232C>A   | p.Q78K   | 0.23 | -                | -               |
| 14 | <i>GPRC6A</i>    | NM_148963        | c.2393T>G  | p.F798C  | 0.13 | -                | -               |
| 14 | <i>HIST1H2BB</i> | NM_021062        | c.72G>C    | p.K24N   | 0.18 | -                | COSM116907<br>1 |
| 14 | <i>HPS5</i>      | NM_007216        | c.244C>G   | p.R82G   | 0.19 | -                | -               |
| 14 | <i>HSPG2</i>     | NM_005529        | c.9352C>T  | p.P3118S | 0.18 | -                | -               |
| 14 | <i>IGSF10</i>    | NM_178822        | c.4869G>C  | p.K1623N | 0.2  | -                | -               |
| 14 | <i>IL1RN</i>     | NM_000577        | c.403G>A   | p.D135N  | 0.19 | -                | -               |
| 14 | <i>KDM7A</i>     | NM_030647        | c.379C>T   | p.R127C  | 0.19 | -                | COSM286115<br>3 |
| 14 | <i>KIAA0391</i>  | NM_014672        | c.1072A>G  | p.I358V  | 0.25 | -                | -               |
| 14 | <i>KNG1</i>      | NM_000893        | c.181G>A   | p.E61K   | 0.24 | -                | -               |
| 14 | <i>KSR2</i>      | NM_173598        | c.1402A>G  | p.T468A  | 0.23 | -                | -               |
| 14 | <i>LRCH2</i>     | NM_020871        | c.1522G>C  | p.E508Q  | 0.34 | -                | -               |
| 14 | <i>MACF1</i>     | NM_012090        | c.12435G>C | p.E4145D | 0.22 | -                | -               |
| 14 | <i>MED24</i>     | NM_014815        | c.700G>C   | p.E234Q  | 0.17 | -                | COSM147952<br>2 |
| 14 | <i>MGA</i>       | NM_00108054<br>1 | c.2137G>C  | p.D713H  | 0.33 | -                | -               |
| 14 | <i>MRTO4</i>     | NM_016183        | c.131C>G   | p.S44C   | 0.14 | -                | -               |
| 14 | <i>MTR</i>       | NM_000254        | c.3632C>T  | p.P1211L | 0.14 | -                | -               |
| 14 | <i>MUC12</i>     | NM_00116446<br>2 | c.5866C>A  | p.P1956T | 0.16 | -                | -               |
| 14 | <i>NACA</i>      | NM_00111320<br>2 | c.10G>A    | p.E4K    | 0.21 | -                | -               |
| 14 | <i>NACC2</i>     | NM_144653        | c.1362G>T  | p.K454N  | 0.15 | -                | -               |
| 14 | <i>NADK</i>      | NM_023018        | c.1315G>A  | p.E439K  | 0.22 | -                | -               |
| 14 | <i>NEFH</i>      | NM_021076        | c.2836G>C  | p.E946Q  | 0.31 | -                | -               |
| 14 | <i>NLRP8</i>     | NM_176811        | c.676G>C   | p.E226Q  | 0.18 | -                | -               |
| 14 | <i>OPCML</i>     | NM_002545        | c.665-5C>T | (exon 5) | 0.22 | -                | -               |
| 14 | <i>PAGE1</i>     | NM_003785        | c.55T>A    | p.S19T   | 0.4  | -                | -               |
| 14 | <i>PCSK1</i>     | NM_000439        | c.1813C>T  | p.R605C  | 0.25 | -                | -               |
| 14 | <i>PIK3CA</i>    | NM_006218        | c.1633G>A  | p.E545K  | 0.21 | RCV00001463<br>1 | COSM763         |
| 14 | <i>PIK3CA</i>    | NM_006218        | c.3172A>C  | p.I1058L | 0.14 | -                | COSM479744      |
| 14 | <i>PITPNC1</i>   | NM_012417        | c.856G>A   | p.E286K  | 0.24 | -                | -               |
| 14 | <i>PLXNA4</i>    | NM_020911        | c.5513G>A  | p.R1838Q | 0.12 | -                | -               |
| 14 | <i>PTGFRN</i>    | NM_020440        | c.359C>T   | p.S120L  | 0.19 | -                | -               |
| 14 | <i>PTPRF</i>     | NM_002840        | c.2356G>A  | p.G786S  | 0.32 | -                | -               |
| 14 | <i>RNASE1</i>    | NM_002933        | c.112C>T   | p.R38W   | 0.21 | -                | -               |

|    |                  |                  |                  |               |      |   |   |
|----|------------------|------------------|------------------|---------------|------|---|---|
| 14 | <i>RNF43</i>     | NM_017763        | c.476G>A         | p.W159*       | 0.17 | - | - |
| 14 | <i>SACS</i>      | NM_014363        | c.9002T>C        | p.I3001T      | 0.33 | - | - |
| 14 | <i>SCN2A</i>     | NM_021007        | c.3906C>G        | p.I1302M      | 0.15 | - | - |
| 14 | <i>SCRT1</i>     | NM_031309        | c.844G>A         | p.G282S       | 0.25 | - | - |
| 14 | <i>SERPINB3</i>  | NM_006919        | c.1084G>C        | p.E362Q       | 0.22 | - | - |
| 14 | <i>SLC4A7</i>    | NM_003615        | c.1010C>T        | p.S337L       | 0.17 | - | - |
| 14 | <i>SMARCB1</i>   | NM_003073        | c.744_745insCCCA | p.D251Hfs*31  | 0.37 | - | - |
| 14 | <i>SMPD4</i>     | NM_017751        | c.803A>G         | p.Y268C       | 0.17 | - | - |
| 14 | <i>TEKT4</i>     | NM_144705        | c.325A>G         | p.M109V       | 0.23 | - | - |
| 14 | <i>UBE4A</i>     | NM_004788        | c.562-1G>C       | (exon 6)      | 0.17 | - | - |
| 14 | <i>UGT2B11</i>   | NM_001073        | c.1201G>C        | p.D401H       | 0.13 | - | - |
| 14 | <i>USP6NL</i>    | NM_014688        | c.1882C>T        | p.H628Y       | 0.26 | - | - |
| 14 | <i>WWP1</i>      | NM_007013        | c.1807G>C        | p.E603Q       | 0.15 | - | - |
| 14 | <i>ZC3H7A</i>    | NM_014153        | c.1144C>T        | p.L382F       | 0.25 | - | - |
| 14 | <i>ZNF236</i>    | NM_007345        | c.821G>A         | p.R274Q       | 0.19 | - | - |
| 14 | <i>ZNF429</i>    | NM_00100141<br>5 | c.1649C>G        | p.S550*       | 0.17 | - | - |
| 14 | <i>ZNF534</i>    | NM_00114393<br>8 | c.1135G>C        | p.E379Q       | 0.21 | - | - |
| 14 | <i>ZNF727</i>    | NM_00115952<br>2 | c.317G>C         | p.C106S       | 0.15 | - | - |
| 15 | <i>C8orf44</i>   | NM_019607        | c.188A>G         | p.K63R        | 0.4  | - | - |
| 15 | <i>DYNAP</i>     | NM_173629        | c.374T>C         | p.M125T       | 0.31 | - | - |
| 16 | <i>AHNAK</i>     | NM_001620        | c.5341G>A        | p.V1781I      | 0.14 | - | - |
| 16 | <i>C14orf159</i> | NM_024952        | c.497T>C         | p.M166T       | 0.14 | - | - |
| 16 | <i>CCDC116</i>   | NM_152612        | c.409C>T         | p.R137C       | 0.13 | - | - |
| 16 | <i>CCDC40</i>    | NM_00124334<br>2 | c.2884G>A        | p.G962R       | 0.08 | - | - |
| 16 | <i>CDK20</i>     | NM_00117064<br>0 | c.581C>T         | p.T194M       | 0.06 | - | - |
| 16 | <i>CLPS</i>      | NM_00125259<br>7 | c.1A>G           | p.M1V         | 0.36 | - | - |
| 16 | <i>DPCR1</i>     | NM_080870        | c.2878A>G        | p.K960E       | 0.06 | - | - |
| 16 | <i>DUSP14</i>    | NM_007026        | c.487C>T         | p.R163C       | 0.11 | - | - |
| 16 | <i>GPR179</i>    | NM_00100433<br>4 | c.235C>T         | p.R79C        | 0.17 | - | - |
| 16 | <i>JARID2</i>    | NM_004973        | c.2416G>A        | p.V806I       | 0.21 | - | - |
| 16 | <i>LMTK3</i>     | NM_00108043<br>4 | c.2951_2952insG  | p.E985Rfs*506 | 0.1  | - | - |
| 16 | <i>LRR1</i>      | NM_152329        | c.986G>A         | p.R329Q       | 0.26 | - | - |
| 16 | <i>PCDHB4</i>    | NM_018938        | c.1417A>C        | p.S473R       | 0.41 | - | - |
| 16 | <i>PCNX</i>      | NM_014982        | c.5567G>A        | p.R1856H      | 0.08 | - | - |

|    |                |                  |             |           |      |   |           |
|----|----------------|------------------|-------------|-----------|------|---|-----------|
| 16 | <i>PLXDC2</i>  | NM_032812        | c.1268C>T   | p.T423I   | 0.31 | - | -         |
| 16 | <i>SLC6A1</i>  | NM_003042        | c.650C>T    | p.T217M   | 0.17 | - | -         |
| 16 | <i>TBXA2R</i>  | NM_201636        | c.1091C>T   | p.A364V   | 0.28 | - | -         |
| 16 | <i>TCEB3C</i>  | NM_145653        | c.1150G>A   | p.A384T   | 0.04 | - | -         |
| 16 | <i>UNC13A</i>  | NM_00108042<br>1 | c.1483C>T   | p.R495C   | 0.13 | - | -         |
| 16 | <i>ZNF285</i>  | NM_152354        | c.254C>G    | p.T85S    | 0.2  | - | -         |
| 17 | <i>ADGRB3</i>  | NM_001704        | c.3713C>T   | p.S1238L  | 0.12 | - | -         |
| 17 | <i>AGAP2</i>   | NM_00112277<br>2 | c.788G>A    | p.R263Q   | 0.1  | - | -         |
| 17 | <i>ATP8B2</i>  | NM_020452        | c.2188G>C   | p.E730Q   | 0.09 | - | -         |
| 17 | <i>BAHD1</i>   | NM_014952        | c.1021G>C   | p.E341Q   | 0.09 | - | -         |
| 17 | <i>CAST</i>    | NM_173060        | c.1618-3C>T | (exon 23) | 0.1  | - | -         |
| 17 | <i>CHGB</i>    | NM_001819        | c.745C>T    | p.H249Y   | 0.15 | - | -         |
| 17 | <i>CTNND2</i>  | NM_001332        | c.2654G>A   | p.R885Q   | 0.12 | - | -         |
| 17 | <i>CYGB</i>    | NM_134268        | c.164C>T    | p.S55L    | 0.08 | - | -         |
| 17 | <i>DDX53</i>   | NM_182699        | c.1189G>A   | p.V397M   | 0.08 | - | -         |
| 17 | <i>HOXA3</i>   | NM_030661        | c.732G>A    | p.M244I   | 0.09 | - | -         |
| 17 | <i>IDI1</i>    | NM_004508        | c.670G>A    | p.E224K   | 0.27 | - | -         |
| 17 | <i>IL6ST</i>   | NM_002184        | c.2245T>A   | p.S749T   | 0.06 | - | -         |
| 17 | <i>IQSEC1</i>  | NM_014869        | c.796G>A    | p.E266K   | 0.13 | - | -         |
| 17 | <i>MOV10L1</i> | NM_018995        | c.3352G>A   | p.D1118N  | 0.12 | - | -         |
| 17 | <i>MUC16</i>   | NM_024690        | c.33380C>G  | p.P11127R | 0.1  | - | -         |
| 17 | <i>OR4N5</i>   | NM_00100472<br>4 | c.329G>C    | p.G110A   | 0.06 | - | -         |
| 17 | <i>OR5M10</i>  | NM_00100474<br>1 | c.512C>G    | p.S171C   | 0.08 | - | -         |
| 17 | <i>PIK3CA</i>  | NM_006218        | c.1624G>C   | p.E542Q   | 0.08 | - | COSM17442 |
| 17 | <i>PLCL1</i>   | NM_006226        | c.482C>T    | p.S161F   | 0.07 | - | -         |
| 17 | <i>UBTD2</i>   | NM_152277        | c.374C>T    | p.P125L   | 0.23 | - | -         |
| 17 | <i>ZNF611</i>  | NM_030972        | c.949T>A    | p.C317S   | 0.13 | - | -         |
| 17 | <i>ZNF728</i>  | NM_00126771<br>6 | c.505G>A    | p.G169R   | 0.11 | - | -         |
| 18 | <i>AQP7</i>    | NM_001170        | c.101T>A    | p.V34E    | 0.09 | - | -         |
| 18 | <i>HLA-B</i>   | NM_005514        | c.121C>A    | p.R41S    | 0.31 | - | -         |
| 18 | <i>KANK2</i>   | NM_015493        | c.530C>T    | p.P177L   | 0.33 | - | -         |
| 18 | <i>MUC2</i>    | NM_002457        | c.2770A>C   | p.M924L   | 0.22 | - | -         |
| 18 | <i>ROR1</i>    | NM_005012        | c.2788G>A   | p.E930K   | 0.06 | - | -         |
| 18 | <i>ZNF195</i>  | NM_00124284<br>1 | c.338A>G    | p.N113S   | 0.26 | - | -         |
| 19 | <i>CYP26B1</i> | NM_019885        | c.1190G>A   | p.R397Q   | 0.14 | - | -         |
| 19 | <i>FUT7</i>    | NM_004479        | c.335G>A    | p.R112Q   | 0.29 | - | -         |

|    |                  |                  |                   |              |      |                  |           |
|----|------------------|------------------|-------------------|--------------|------|------------------|-----------|
| 19 | <i>IGSF22</i>    | NM_173588        | c.3247G>A         | p.E1083K     | 0.21 | -                | -         |
| 19 | <i>JAG2</i>      | NM_002226        | c.3702C>A         | p.Y1234*     | 0.16 | -                | -         |
| 19 | <i>MYRF</i>      | NM_013279        | c.1645G>C         | p.G549R      | 0.12 | -                | -         |
| 19 | <i>PCDHA9</i>    | NM_014005        | c.1061C>T         | p.T354M      | 0.12 | -                | -         |
| 19 | <i>PIK3CA</i>    | NM_006218        | c.1637A>G         | p.Q546R      | 0.12 | RCV00003867<br>2 | COSM12459 |
| 19 | <i>SLCO1B3</i>   | NM_019844        | c.1510T>A         | p.C504S      | 0.15 | -                | -         |
| 19 | <i>SOGA1</i>     | NM_080627        | c.2237T>C         | p.F746S      | 0.13 | -                | -         |
| 19 | <i>TTN</i>       | NM_003319        | c.31156C>T        | p.R10386C    | 0.16 | -                | -         |
| 19 | <i>UQCRFS1</i>   | NM_006003        | c.397G>A          | p.V133I      | 0.13 | -                | -         |
| 21 | <i>KRTAP4-11</i> | NM_033059        | c.249C>G          | p.S83R       | 0.26 | -                | -         |
| 21 | <i>NPIP5</i>     | NM_00113586<br>5 | c.1549C>T         | p.R517C      | 0.05 | -                | -         |
| 21 | <i>SPDYE1</i>    | NM_175064        | c.791A>G          | p.H264R      | 0.1  | -                | -         |
| 39 | <i>ACOT2</i>     | NM_006821        | c.620G>C          | p.R207P      | 0.23 | -                | -         |
| 39 | <i>ADRB1</i>     | NM_000684        | c.790C>T          | p.R264C      | 0.21 | -                | -         |
| 39 | <i>ALDH3B2</i>   | NM_000695        | c.10G>A           | p.E4K        | 0.2  | -                | -         |
| 39 | <i>BCL11B</i>    | NM_00128223<br>8 | c.2078C>T         | p.S693L      | 0.17 | -                | -         |
| 39 | <i>BCL9</i>      | NM_004326        | c.2518dupG        | p.L841Pfs*21 | 0.08 | -                | -         |
| 39 | <i>C10orf71</i>  | NM_00113519<br>6 | c.832G>C          | p.E278Q      | 0.09 | -                | -         |
| 39 | <i>CACNA1E</i>   | NM_00120529<br>4 | c.5082+3G>A       | (exon 36)    | 0.13 | -                | -         |
| 39 | <i>CASP8AP2</i>  | NM_00113766<br>7 | c.1600G>C         | p.D534H      | 0.46 | -                | -         |
| 39 | <i>CCDC121</i>   | NM_00114268<br>3 | c.848T>C          | p.I283T      | 0.14 | -                | -         |
| 39 | <i>CHRNA10</i>   | NM_00130303<br>4 | c.445G>C          | p.E149Q      | 0.12 | -                | -         |
| 39 | <i>CHRNA7</i>    | NM_000746        | c.1066G>A         | p.A356T      | 0.05 | -                | -         |
| 39 | <i>CLDN18</i>    | NM_016369        | c.139G>A          | p.E47K       | 0.19 | -                | -         |
| 39 | <i>COQ4</i>      | NM_016035        | c.567G>C          | p.Q189H      | 0.25 | -                | -         |
| 39 | <i>DHX35</i>     | NM_00119080<br>9 | c.1963C>T         | p.Q655X      | 0.28 | -                | -         |
| 39 | <i>DLGAP1</i>    | NM_00100380<br>9 | c.811G>A          | p.G271R      | 0.24 | -                | -         |
| 39 | <i>EPB41L3</i>   | NM_00128153<br>3 | c.475G>A          | p.E159K      | 0.48 | -                | -         |
| 39 | <i>FAM160A1</i>  | NM_00110997<br>7 | c.1621G>A         | p.E541K      | 0.17 | -                | -         |
| 39 | <i>FASN</i>      | NM_004104        | c.6060_6062delCTC | p.2020delS   | 0.12 | -                | -         |



|    |                  |                  |             |               |      |   |   |
|----|------------------|------------------|-------------|---------------|------|---|---|
| 39 | <i>FCRL1</i>     | NM_00115939<br>7 | c.733G>T    | p.E245X       | 0.17 | - | - |
| 39 | <i>GAREM1</i>    | NM_00124240<br>9 | c.1402C>T   | p.L468F       | 0.23 | - | - |
| 39 | <i>GON4L</i>     | NM_00128285<br>6 | c.4960C>T   | p.Q1654X      | 0.18 | - | - |
| 39 | <i>HAUS4</i>     | NM_00116626<br>9 | c.196C>T    | p.Q66X        | 0.16 | - | - |
| 39 | <i>HPCAL4</i>    | NM_00128239<br>6 | c.163-5C>-  | (exon 4)      | 0.32 | - | - |
| 39 | <i>HTRA1</i>     | NM_002775        | c.1297G>A   | p.V433I       | 0.21 | - | - |
| 39 | <i>KIAA0754</i>  | NM_015038        | c.4118dupT  | p.M1374Hfs*35 | 0.16 | - | - |
| 39 | <i>KIAA1549</i>  | NM_00116466<br>5 | c.2179C>T   | p.L727F       | 0.27 | - | - |
| 39 | <i>KIAA1958</i>  | NM_133465        | c.1513T>G   | p.S505A       | 0.1  | - | - |
| 39 | <i>LILRA2</i>    | NM_00129027<br>0 | c.1166C>G   | p.S389C       | 0.07 | - | - |
| 39 | <i>LONP1</i>     | NM_004793        | c.1686-1G>A | (exon 11)     | 0.24 | - | - |
| 39 | <i>METTL10</i>   | NM_212554        | c.8C>G      | p.S3W         | 0.15 | - | - |
| 39 | <i>MRM1</i>      | NM_024864        | c.80G>A     | p.G27E        | 0.27 | - | - |
| 39 | <i>MTCL1</i>     | NM_015210        | c.3328G>A   | p.E1110K      | 0.09 | - | - |
| 39 | <i>MYO10</i>     | NM_012334        | c.3079G>A   | p.D1027N      | 0.08 | - | - |
| 39 | <i>MYO7B</i>     | NM_00108052<br>7 | c.6037G>A   | p.E2013K      | 0.18 | - | - |
| 39 | <i>NDUFS8</i>    | NM_002496        | c.412C>T    | p.R138C       | 0.07 | - | - |
| 39 | <i>NEUROD1</i>   | NM_002500        | c.223G>A    | p.E75K        | 0.2  | - | - |
| 39 | <i>NOC2L</i>     | NM_015658        | c.2221G>A   | p.E741K       | 0.42 | - | - |
| 39 | <i>OR2T8</i>     | NM_00100552<br>2 | c.81G>T     | p.M27I        | 0.26 | - | - |
| 39 | <i>OVGP1</i>     | NM_002557        | c.1555C>T   | p.P519S       | 0.18 | - | - |
| 39 | <i>PCDHA9</i>    | NM_014005        | c.544G>A    | p.V182M       | 0.2  | - | - |
| 39 | <i>PEG3</i>      | NM_00114618<br>6 | c.4486C>G   | p.Q1496E      | 0.17 | - | - |
| 39 | <i>PLPP6</i>     | NM_203453        | c.611C>T    | p.S204L       | 0.14 | - | - |
| 39 | <i>PMFBP1</i>    | NM_031293        | c.1213G>A   | p.E405K       | 0.29 | - | - |
| 39 | <i>POM121L12</i> | NM_182595        | c.308C>T    | p.P103L       | 0.11 | - | - |
| 39 | <i>PRDM13</i>    | NM_021620        | c.707C>T    | p.S236L       | 0.26 | - | - |
| 39 | <i>PTPRT</i>     | NM_007050        | c.886G>A    | p.E296K       | 0.18 | - | - |
| 39 | <i>RNF213</i>    | NM_00125607<br>1 | c.13115T>G  | p.L4372R      | 0.23 | - | - |
| 39 | <i>RPS6KA2</i>   | NM_021135        | c.1901C>T   | p.S634F       | 0.26 | - | - |
| 39 | <i>RRBP1</i>     | NM_004587        | c.710T>G    | p.L237R       | 0.13 | - | - |

|    |                  |                  |            |          |      |   |   |
|----|------------------|------------------|------------|----------|------|---|---|
| 39 | <i>RRP7A</i>     | NM_015703        | c.712C>A   | p.L238M  | 0.12 | - | - |
| 39 | <i>RTL1</i>      | NM_00113488<br>8 | c.2972G>A  | p.R991Q  | 0.08 | - | - |
| 39 | <i>SALL3</i>     | NM_171999        | c.3718C>T  | p.Q1240X | 0.12 | - | - |
| 39 | <i>SETD7</i>     | NM_00130619<br>9 | c.264C>G   | p.D88E   | 0.12 | - | - |
| 39 | <i>SHISA7</i>    | NM_00114517<br>6 | c.976+3G>A | (exon 3) | 0.22 | - | - |
| 39 | <i>SOX12</i>     | NM_006943        | c.856G>A   | p.E286K  | 0.16 | - | - |
| 39 | <i>SPATA31D1</i> | NM_00100167<br>0 | c.1890G>T  | p.Q630H  | 0.21 | - | - |
| 39 | <i>TBX4</i>      | NM_018488        | c.1055G>A  | p.R352Q  | 0.22 | - | - |
| 39 | <i>THEMIS2</i>   | NM_00103947<br>7 | c.160C>T   | p.Q54X   | 0.18 | - | - |
| 39 | <i>TNKS1BP1</i>  | NM_033396        | c.3718G>A  | p.E1240K | 0.09 | - | - |
| 39 | <i>TNR</i>       | NM_003285        | c.3219G>C  | p.L1073F | 0.3  | - | - |
| 39 | <i>TP53BP1</i>   | NM_00114197<br>9 | c.5764G>A  | p.V1922M | 0.21 | - | - |
| 39 | <i>TUBB4B</i>    | NM_006088        | c.1234G>A  | p.E412K  | 0.19 | - | - |
| 39 | <i>TULP4</i>     | NM_00100746<br>6 | c.1972T>A  | p.F658I  | 0.24 | - | - |
| 39 | <i>USP40</i>     | NM_018218        | c.488G>A   | p.G163E  | 0.23 | - | - |
| 39 | <i>ZNF711</i>    | NM_021998        | c.1442G>C  | p.C481S  | 0.57 | - | - |
| 39 | <i>ZNRF3</i>     | NM_00120699<br>8 | c.2221G>A  | p.E741K  | 0.13 | - | - |
| 39 | <i>ZSCAN10</i>   | NM_00128241<br>5 | c.925G>A   | p.A309T  | 0.22 | - | - |
| 40 | <i>ABCA1</i>     | NM_005502        | c.2140G>A  | p.D714N  | 0.15 | - | - |
| 40 | <i>ADH1A</i>     | NM_000667        | c.944G>A   | p.W315X  | 0.08 | - | - |
| 40 | <i>AMIGO2</i>    | NM_181847        | c.174C>A   | p.N58K   | 0.16 | - | - |
| 40 | <i>BTD</i>       | NM_000060        | c.809C>T   | p.T270I  | 0.12 | - | - |
| 40 | <i>C19orf24</i>  | NM_017914        | c.80A>G    | p.E27G   | 0.17 | - | - |
| 40 | <i>C2orf69</i>   | NM_153689        | c.1012G>A  | p.D338N  | 0.13 | - | - |
| 40 | <i>CAPN7</i>     | NM_014296        | c.1810G>A  | p.E604K  | 0.34 | - | - |
| 40 | <i>CARNS1</i>    | NM_020811        | c.214G>A   | p.D72N   | 0.16 | - | - |
| 40 | <i>CDCA5</i>     | NM_080668        | c.404A>G   | p.D135G  | 0.18 | - | - |
| 40 | <i>CENPF</i>     | NM_016343        | c.3115C>G  | p.L1039V | 0.3  | - | - |
| 40 | <i>CTTNBP2</i>   | NM_033427        | c.3201C>G  | p.S1067R | 0.23 | - | - |
| 40 | <i>CUX1</i>      | NM_00120254<br>3 | c.2893G>T  | p.E965X  | 0.21 | - | - |
| 40 | <i>CYFIP1</i>    | NM_014608        | c.44A>G    | p.D15G   | 0.15 | - | - |

|    |                 |                  |                   |               |      |   |   |
|----|-----------------|------------------|-------------------|---------------|------|---|---|
| 40 | <i>DDX54</i>    | NM_00111132<br>2 | c.1505C>T         | p.S502L       | 0.17 | - | - |
| 40 | <i>DFNB31</i>   | NM_00117342<br>5 | c.334G>A          | p.E112K       | 0.17 | - | - |
| 40 | <i>DPEP3</i>    | NM_00112975<br>8 | c.1414C>T         | p.H472Y       | 0.14 | - | - |
| 40 | <i>DPEP3</i>    | NM_00112975<br>8 | c.590C>G          | p.S197C       | 0.17 | - | - |
| 40 | <i>EP300</i>    | NM_001429        | c.3798G>A         | p.W1266X      | 0.37 | - | - |
| 40 | <i>EPHB2</i>    | NM_00130919<br>2 | c.1237G>A         | p.G413S       | 0.16 | - | - |
| 40 | <i>EPHB3</i>    | NM_004443        | c.514_515insGCCGT | p.V174Afs*175 | 0.09 | - | - |
| 40 | <i>ERBB3</i>    | NM_001982        | c.2773G>A         | p.E925K       | 0.12 | - | - |
| 40 | <i>FAM179B</i>  | NM_00130812<br>0 | c.280G>A          | p.E94K        | 0.16 | - | - |
| 40 | <i>FCHO1</i>    | NM_00116135<br>9 | c.1189G>A         | p.E397K       | 0.35 | - | - |
| 40 | <i>FSIP2</i>    | NM_173651        | c.16366G>A        | p.D5456N      | 0.15 | - | - |
| 40 | <i>GNPAT</i>    | NM_00131635<br>0 | c.35C>T           | p.S12F        | 0.1  | - | - |
| 40 | <i>GPC2</i>     | NM_152742        | c.1487-1G>A       | (exon 10)     | 0.19 | - | - |
| 40 | <i>GPRASP2</i>  | NM_00118487<br>5 | c.1795G>A         | p.E599K       | 0.21 | - | - |
| 40 | <i>GSX2</i>     | NM_133267        | c.791C>T          | p.T264M       | 0.15 | - | - |
| 40 | <i>HELZ2</i>    | NM_033405        | c.3260A>T         | p.Q1087L      | 0.07 | - | - |
| 40 | <i>HIST1H1T</i> | NM_005323        | c.148G>A          | p.E50K        | 0.12 | - | - |
| 40 | <i>HMX2</i>     | NM_005519        | c.707C>T          | p.S236L       | 0.06 | - | - |
| 40 | <i>HTR6</i>     | NM_000871        | c.1207G>A         | p.E403K       | 0.2  | - | - |
| 40 | <i>KDM3B</i>    | NM_016604        | c.4789G>A         | p.E1597K      | 0.18 | - | - |
| 40 | <i>KIR2DL1</i>  | NM_014218        | c.854G>A          | p.R285K       | 0.11 | - | - |
| 40 | <i>LENG1</i>    | NM_024316        | c.130G>A          | p.E44K        | 0.24 | - | - |
| 40 | <i>LMAN1</i>    | NM_005570        | c.304G>A          | p.E102K       | 0.18 | - | - |
| 40 | <i>LTBR</i>     | NM_00127098<br>7 | c.1111G>A         | p.E371K       | 0.13 | - | - |
| 40 | <i>LTN1</i>     | NM_015565        | c.1417G>A         | p.E473K       | 0.23 | - | - |
| 40 | <i>LTN1</i>     | NM_015565        | c.1426G>T         | p.E476X       | 0.22 | - | - |
| 40 | <i>MAGEB17</i>  | NM_00127730<br>7 | c.730G>A          | p.E244K       | 0.14 | - | - |
| 40 | <i>MC5R</i>     | NM_005913        | c.788C>G          | p.S263C       | 0.18 | - | - |
| 40 | <i>MLLT4</i>    | NM_00129196<br>4 | c.4996C>T         | p.Q1666X      | 0.16 | - | - |

|    |                 |                  |            |           |      |   |   |
|----|-----------------|------------------|------------|-----------|------|---|---|
| 40 | <i>MTMR1</i>    | NM_00130614<br>5 | c.961G>A   | p.E321K   | 0.22 | - | - |
| 40 | <i>MUC4</i>     | NM_018406        | c.4775C>T  | p.S1592L  | 0.05 | - | - |
| 40 | <i>NEURL1</i>   | NM_004210        | c.790G>A   | p.E264K   | 0.13 | - | - |
| 40 | <i>NOP56</i>    | NM_006392        | c.1256A>T  | p.D419V   | 0.06 | - | - |
| 40 | <i>NPIP5</i>    | NM_00113586<br>5 | c.1861C>T  | p.Q621X   | 0.08 | - | - |
| 40 | <i>NXF5</i>     | NM_032946        | c.42C>G    | p.F14L    | 0.2  | - | - |
| 40 | <i>OVOL1</i>    | NM_004561        | c.151G>A   | p.V51M    | 0.12 | - | - |
| 40 | <i>PARVG</i>    | NM_00113760<br>5 | c.616C>G   | p.P206A   | 0.15 | - | - |
| 40 | <i>PCLO</i>     | NM_014510        | c.6511G>A  | p.E2171K  | 0.21 | - | - |
| 40 | <i>PDE12</i>    | NM_177966        | c.998A>G   | p.N333S   | 0.24 | - | - |
| 40 | <i>PDE4DIP</i>  | NM_00100281<br>1 | c.101C>T   | p.S34L    | 0.07 | - | - |
| 40 | <i>PELI3</i>    | NM_00124313<br>6 | c.163G>A   | p.D55N    | 0.14 | - | - |
| 40 | <i>PMFBP1</i>   | NM_031293        | c.1720C>G  | p.Q574E   | 0.17 | - | - |
| 40 | <i>POLD1</i>    | NM_00130863<br>2 | c.1682G>A  | p.R561Q   | 0.16 | - | - |
| 40 | <i>RDH11</i>    | NM_00125265<br>0 | c.407C>G   | p.S136W   | 0.16 | - | - |
| 40 | <i>RNF123</i>   | NM_022064        | c.922C>T   | p.R308W   | 0.21 | - | - |
| 40 | <i>RREB1</i>    | NM_00100369<br>8 | c.364G>A   | p.E122K   | 0.2  | - | - |
| 40 | <i>SIK2</i>     | NM_015191        | c.2125G>C  | p.E709Q   | 0.15 | - | - |
| 40 | <i>SKIDA1</i>   | NM_207371        | c.1520A>C  | p.D507A   | 0.22 | - | - |
| 40 | <i>SLC9A7</i>   | NM_00125729<br>1 | c.714G>C   | p.K238N   | 0.34 | - | - |
| 40 | <i>SRCAP</i>    | NM_006662        | c.2518C>G  | p.R840G   | 0.16 | - | - |
| 40 | <i>SUFU</i>     | NM_00117813<br>3 | c.1099G>C  | p.E367Q   | 0.18 | - | - |
| 40 | <i>SUMF2</i>    | NM_00104246<br>9 | c.167G>A   | p.R56K    | 0.18 | - | - |
| 40 | <i>TINAGL1</i>  | NM_00120441<br>4 | c.112C>T   | p.R38W    | 0.16 | - | - |
| 40 | <i>TMEM63A</i>  | NM_014698        | c.127C>T   | p.Q43X    | 0.31 | - | - |
| 40 | <i>TRAPPC13</i> | NM_00109375<br>6 | c.617C>T   | p.S206L   | 0.36 | - | - |
| 40 | <i>TTN</i>      | NM_003319        | c.75965C>G | p.S25322C | 0.15 | - | - |
| 40 | <i>TTN</i>      | NM_003319        | c.76951C>T | p.H25651Y | 0.13 | - | - |
| 40 | <i>TTN</i>      | NM_003319        | c.77291C>T | p.S25764L | 0.23 | - | - |

|    |                 |                  |            |           |      |   |           |
|----|-----------------|------------------|------------|-----------|------|---|-----------|
| 40 | <i>TTN</i>      | NM_003319        | c.78890C>G | p.S26297C | 0.19 | - | -         |
| 40 | <i>UCP2</i>     | NM_003355        | c.334G>C   | p.E112Q   | 0.17 | - | -         |
| 40 | <i>USP29</i>    | NM_020903        | c.1907G>C  | p.R636T   | 0.22 | - | -         |
| 40 | <i>WDR24</i>    | NM_032259        | c.1362C>G  | p.I454M   | 0.23 | - | -         |
| 40 | <i>WDR38</i>    | NM_00127637<br>6 | c.614C>T   | p.S205F   | 0.16 | - | -         |
| 40 | <i>ZSWIM5</i>   | NM_020883        | c.3397C>T  | p.R1133C  | 0.17 | - | -         |
| 41 | <i>ARPP21</i>   | NM_00126761<br>7 | c.2216C>T  | p.P739L   | 0.1  | - | -         |
| 41 | <i>ERBB2</i>    | NM_00128993<br>7 | c.929C>T   | p.S310F   | 0.11 | - | COSM48358 |
| 42 | <i>ADAMTS16</i> | NM_139056        | c.2738C>T  | p.T913I   | 0.22 | - | -         |
| 42 | <i>ADRA2C</i>   | NM_000683        | c.607G>A   | p.G203S   | 0.07 | - | -         |
| 42 | <i>AGRP</i>     | NM_001138        | c.161C>T   | p.T54I    | 0.23 | - | -         |
| 42 | <i>APOH</i>     | NM_000042        | c.460C>T   | p.R154C   | 0.18 | - | -         |
| 42 | <i>ATXN2</i>    | NM_00131012<br>3 | c.2290C>T  | p.Q764X   | 0.23 | - | -         |
| 42 | <i>CAD</i>      | NM_00130607<br>9 | c.6229G>A  | p.D2077N  | 0.17 | - | -         |
| 42 | <i>CAD</i>      | NM_00130607<br>9 | c.6327G>A  | p.M2109I  | 0.21 | - | -         |
| 42 | <i>CDKN2A</i>   | NM_000077        | c.245T>G   | p.V82G    | 0.21 | - | -         |
| 42 | <i>CEACAM5</i>  | NM_00129148<br>4 | c.546T>A   | p.N182K   | 0.2  | - | -         |
| 42 | <i>CEP295</i>   | NM_033395        | c.5978A>G  | p.K1993R  | 0.27 | - | -         |
| 42 | <i>CHRNA4</i>   | NM_000744        | c.1034G>A  | p.R345H   | 0.12 | - | -         |
| 42 | <i>COL22A1</i>  | NM_152888        | c.359C>T   | p.A120V   | 0.11 | - | -         |
| 42 | <i>DDX53</i>    | NM_182699        | c.784C>G   | p.L262V   | 0.43 | - | -         |
| 42 | <i>DOT1L</i>    | NM_032482        | c.448G>C   | p.E150Q   | 0.15 | - | -         |
| 42 | <i>FARP1</i>    | NM_005766        | c.2527G>A  | p.E843K   | 0.08 | - | -         |
| 42 | <i>GTF3C4</i>   | NM_012204        | c.523G>A   | p.D175N   | 0.29 | - | -         |
| 42 | <i>GYPC</i>     | NM_016815        | c.86G>C    | p.R29T    | 0.16 | - | -         |
| 42 | <i>HHIPL2</i>   | NM_024746        | c.562G>A   | p.D188N   | 0.12 | - | -         |
| 42 | <i>HSF1</i>     | NM_005526        | c.718T>G   | p.Y240D   | 0.13 | - | -         |
| 42 | <i>KIR3DL2</i>  | NM_00124286<br>7 | c.486G>T   | p.E162D   | 0.05 | - | -         |
| 42 | <i>KLK4</i>     | NM_00130296<br>1 | c.223G>A   | p.V75M    | 0.06 | - | -         |
| 42 | <i>LIPE</i>     | NM_005357        | c.3049C>A  | p.R1017S  | 0.25 | - | -         |
| 42 | <i>LRRN2</i>    | NM_201630        | c.1721G>A  | p.R574H   | 0.13 | - | -         |
| 42 | <i>MAD1L1</i>   | NM_00130452<br>5 | c.349G>A   | p.D117N   | 0.12 | - | -         |

|    |                  |                  |                       |               |      |   |   |
|----|------------------|------------------|-----------------------|---------------|------|---|---|
| 42 | <i>OR51S1</i>    | NM_00100475<br>8 | c.137C>G              | p.S46C        | 0.21 | - | - |
| 42 | <i>OR6F1</i>     | NM_00100528<br>6 | c.422C>T              | p.S141L       | 0.25 | - | - |
| 42 | <i>PLK1</i>      | NM_005030        | c.1711G>A             | p.G571S       | 0.06 | - | - |
| 42 | <i>PPP1R26</i>   | NM_014811        | c.1834G>A             | p.E612K       | 0.27 | - | - |
| 42 | <i>RAB40C</i>    | NM_021168        | c.552G>A              | p.W184X       | 0.09 | - | - |
| 42 | <i>SH2D6</i>     | NM_198482        | c.490C>G              | p.R164G       | 0.1  | - | - |
| 42 | <i>SLC18A3</i>   | NM_003055        | c.358G>A              | p.E120K       | 0.17 | - | - |
| 42 | <i>SMAD3</i>     | NM_00114510<br>4 | c.654G>T              | p.Q218H       | 0.14 | - | - |
| 42 | <i>SMYD4</i>     | NM_052928        | c.892C>T              | p.R298X       | 0.14 | - | - |
| 42 | <i>SNAP25</i>    | NM_003081        | c.531G>C              | p.Q177H       | 0.37 | - | - |
| 42 | <i>SORCS3</i>    | NM_014978        | c.3202G>A             | p.E1068K      | 0.21 | - | - |
| 42 | <i>SPEF1</i>     | NM_015417        | c.553C>A              | p.Q185K       | 0.1  | - | - |
| 42 | <i>SRC</i>       | NM_005417        | c.142C>T              | p.R48C        | 0.2  | - | - |
| 42 | <i>TP63</i>      | NM_00111498<br>0 | c.1543G>A             | p.E515K       | 0.18 | - | - |
| 42 | <i>WNT7A</i>     | NM_004625        | c.1032G>C             | p.E344D       | 0.12 | - | - |
| 43 | <i>IRS2</i>      | NM_003749        | c.3751C>G             | p.L1251V      | 0.07 | - | - |
| 43 | <i>KRTAP3-3</i>  | NM_033185        | c.20G>A               | p.R7Q         | 0.22 | - | - |
| 43 | <i>MUC5B</i>     | NM_002458        | c.16800+2T>A          | (exon 45)     | 0.06 | - | - |
| 43 | <i>PCDHA2</i>    | NM_018905        | c.2252C>T             | p.S751L       | 0.07 | - | - |
| 43 | <i>TCOF1</i>     | NM_000356        | c.959C>T              | p.A320V       | 0.14 | - | - |
| 44 | <i>C19orf66</i>  | NM_00130827<br>7 | c.301G>A              | p.D101N       | 0.06 | - | - |
| 44 | <i>CYP2A6</i>    | NM_000762        | c.932G>A              | p.R311H       | 0.06 | - | - |
| 44 | <i>ENGASE</i>    | NM_00104257<br>3 | c.1185C>G             | p.I395M       | 0.08 | - | - |
| 44 | <i>FAM184B</i>   | NM_015688        | c.579G>A              | p.M193I       | 0.11 | - | - |
| 44 | <i>FARS2</i>     | NM_006567        | c.90G>T               | p.Q30H        | 0.06 | - | - |
| 44 | <i>FBN3</i>      | NM_032447        | c.8228G>A             | p.R2743H      | 0.13 | - | - |
| 44 | <i>FUT3</i>      | NM_00109764<br>1 | c.179_187delGCCCCACCC | p.58_60delPTR | 0.21 | - | - |
| 44 | <i>LOC389895</i> | NM_00127156<br>0 | c.451G>T              | p.A151S       | 0.11 | - | - |
| 44 | <i>LRRC40</i>    | NM_017768        | c.131C>A              | p.S44X        | 0.12 | - | - |
| 44 | <i>MAP3K10</i>   | NM_002446        | c.1403G>A             | p.R468Q       | 0.08 | - | - |
| 44 | <i>MYO15A</i>    | NM_016239        | c.1375G>A             | p.E459K       | 0.07 | - | - |
| 44 | <i>PCDH8</i>     | NM_002590        | c.3110G>A             | p.R1037H      | 0.12 | - | - |
| 44 | <i>PLEC</i>      | NM_201378        | c.8846T>G             | p.V2949G      | 0.05 | - | - |

|    |                 |                  |                         |                       |      |   |   |
|----|-----------------|------------------|-------------------------|-----------------------|------|---|---|
| 44 | <i>RHOBTB2</i>  | NM_00116003<br>7 | c.230G>A                | p.R77Q                | 0.1  | - | - |
| 44 | <i>RLIM</i>     | NM_016120        | c.176G>A                | p.S59N                | 0.14 | - | - |
| 44 | <i>SIGLEC12</i> | NM_033329        | c.553A>G                | p.T185A               | 0.13 | - | - |
| 44 | <i>TP53</i>     | NM_000546        | c.827_830delCCTG        | p.A276Vfs*68          | 0.11 | - | - |
| 44 | <i>UBQLN3</i>   | NM_017481        | c.1400C>T               | p.A467V               | 0.13 | - | - |
| 44 | <i>ZNF423</i>   | NM_00127162<br>0 | c.1805A>G               | p.Q602R               | 0.06 | - | - |
| 45 | <i>DACT1</i>    | NM_00107952<br>0 | c.2009C>T               | p.A670V               | 0.1  | - | - |
| 45 | <i>DUSP9</i>    | NM_001395        | c.527C>A                | p.S176Y               | 0.32 | - | - |
| 45 | <i>ICT1</i>     | NM_00130326<br>5 | c.158A>C                | p.Q53P                | 0.07 | - | - |
| 45 | <i>ITPR3</i>    | NM_002224        | c.1954A>C               | p.I652L               | 0.05 | - | - |
| 45 | <i>KCNJ4</i>    | NM_004981        | c.100A>C                | p.N34H                | 0.05 | - | - |
| 45 | <i>KCNK12</i>   | NM_022055        | c.862G>T                | p.V288L               | 0.06 | - | - |
| 45 | <i>KLHL26</i>   | NM_018316        | c.280G>A                | p.G94S                | 0.09 | - | - |
| 45 | <i>LILRA5</i>   | NM_181985        | c.461T>G                | p.L154R               | 0.12 | - | - |
| 45 | <i>MFSD12</i>   | NM_00128752<br>9 | c.1196T>G               | p.M399R               | 0.07 | - | - |
| 45 | <i>MYO9B</i>    | NM_00113006<br>5 | c.499A>C                | p.K167Q               | 0.05 | - | - |
| 45 | <i>PARP9</i>    | NM_00114610<br>2 | c.440G>A                | p.G147E               | 0.14 | - | - |
| 45 | <i>PCDHB3</i>   | NM_018937        | c.1708G>A               | p.A570T               | 0.08 | - | - |
| 45 | <i>PLXNB2</i>   | NM_012401        | c.4127_4135delTCCTGGAGC | p.1374_1376delLE<br>L | 0.11 | - | - |
| 45 | <i>PRDM16</i>   | NM_022114        | c.2555C>T               | p.P852L               | 0.14 | - | - |
| 45 | <i>SCN5A</i>    | NM_000335        | c.2182G>A               | p.V728I               | 0.09 | - | - |
| 45 | <i>SNX32</i>    | NM_152760        | c.1057G>T               | p.D353Y               | 0.09 | - | - |
| 45 | <i>ZNF646</i>   | NM_014699        | c.1513A>C               | p.M505L               | 0.07 | - | - |
| 46 | <i>ADCK2</i>    | NM_052853        | c.175G>A                | p.E59K                | 0.08 | - | - |
| 47 | <i>ALPK2</i>    | NM_052947        | c.3524C>T               | p.S1175L              | 0.18 | - | - |
| 47 | <i>AP3B2</i>    | NM_004644        | c.3099-3C>T             | (exon 26)             | 0.29 | - | - |
| 47 | <i>APBA2</i>    | NM_00113041<br>4 | c.1646C>T               | p.S549L               | 0.23 | - | - |
| 47 | <i>BEST4</i>    | NM_153274        | c.130G>T                | p.A44S                | 0.29 | - | - |
| 47 | <i>C9orf64</i>  | NM_032307        | c.157C>T                | p.H53Y                | 0.25 | - | - |
| 47 | <i>CNOT1</i>    | NM_00126561<br>2 | c.4291C>T               | p.R1431X              | 0.27 | - | - |
| 47 | <i>COQ4</i>     | NM_00130594<br>2 | c.31C>G                 | p.R11G                | 0.24 | - | - |

|    |                  |                  |                  |              |      |   |   |
|----|------------------|------------------|------------------|--------------|------|---|---|
| 47 | <i>CTNND2</i>    | NM_001332        | c.65C>T          | p.S22L       | 0.42 | - | - |
| 47 | <i>DAPK1</i>     | NM_00128872<br>9 | c.2641C>T        | p.Q881X      | 0.32 | - | - |
| 47 | <i>DCAF8</i>     | NM_015726        | c.1153G>A        | p.E385K      | 0.23 | - | - |
| 47 | <i>DDOST</i>     | NM_005216        | c.870A>C         | p.E290D      | 0.13 | - | - |
| 47 | <i>DDX49</i>     | NM_019070        | c.1024G>A        | p.A342T      | 0.31 | - | - |
| 47 | <i>EHMT2</i>     | NM_00128941<br>3 | c.1820G>A        | p.R607Q      | 0.44 | - | - |
| 47 | <i>FCRL1</i>     | NM_00115939<br>7 | c.666G>C         | p.E222D      | 0.32 | - | - |
| 47 | <i>GSG1</i>      | NM_00108055<br>4 | c.241G>A         | p.D81N       | 0.12 | - | - |
| 47 | <i>HELZ</i>      | NM_014877        | c.4696G>A        | p.E1566K     | 0.16 | - | - |
| 47 | <i>IFT140</i>    | NM_014714        | c.2856G>A        | p.M952I      | 0.25 | - | - |
| 47 | <i>IFT140</i>    | NM_014714        | c.3430G>A        | p.E1144K     | 0.27 | - | - |
| 47 | <i>INSRR</i>     | NM_014215        | c.1504C>T        | p.R502C      | 0.08 | - | - |
| 47 | <i>ITGAL</i>     | NM_00111438<br>0 | c.2434G>A        | p.A812T      | 0.29 | - | - |
| 47 | <i>ITPKA</i>     | NM_002220        | c.1273G>A        | p.D425N      | 0.18 | - | - |
| 47 | <i>KIF25</i>     | NM_030615        | c.898G>A         | p.A300T      | 0.46 | - | - |
| 47 | <i>KRT38</i>     | NM_006771        | c.1121C>T        | p.S374F      | 0.21 | - | - |
| 47 | <i>LOC441155</i> | NM_00127167<br>5 | c.433G>A         | p.E145K      | 0.29 | - | - |
| 47 | <i>LRP1</i>      | NM_002332        | c.2608C>G        | p.R870G      | 0.1  | - | - |
| 47 | <i>MAGI1</i>     | NM_00103305<br>7 | c.2087C>T        | p.A696V      | 0.17 | - | - |
| 47 | <i>METTL14</i>   | NM_020961        | c.1343_1344delCA | p.H449Rfs*71 | 0.25 | - | - |
| 47 | <i>MICB</i>      | NM_00128916<br>0 | c.426G>A         | p.M142I      | 0.36 | - | - |
| 47 | <i>MYH9</i>      | NM_002473        | c.3488C>T        | p.S1163L     | 0.21 | - | - |
| 47 | <i>NEU2</i>      | NM_005383        | c.277G>A         | p.A93T       | 0.19 | - | - |
| 47 | <i>NLRP7</i>     | NM_00112725<br>5 | c.331G>T         | p.D111Y      | 0.22 | - | - |
| 47 | <i>ODF1</i>      | NM_024410        | c.520G>A         | p.E174K      | 0.07 | - | - |
| 47 | <i>PDE4A</i>     | NM_00124312<br>1 | c.46G>T          | p.E16X       | 0.27 | - | - |
| 47 | <i>PTH</i>       | NM_000315        | c.236C>T         | p.S79F       | 0.25 | - | - |
| 47 | <i>RBM8A</i>     | NM_005105        | c.40G>A          | p.D14N       | 0.16 | - | - |
| 47 | <i>RPS12</i>     | NM_001016        | c.7G>A           | p.E3K        | 0.33 | - | - |
| 47 | <i>SEC62</i>     | NM_003262        | c.1156G>A        | p.E386K      | 0.22 | - | - |
| 47 | <i>SELE</i>      | NM_000450        | c.820G>A         | p.E274K      | 0.2  | - | - |



|    |                 |                  |             |           |      |                  |                 |
|----|-----------------|------------------|-------------|-----------|------|------------------|-----------------|
| 47 | <i>SEMA4A</i>   | NM_00119330<br>2 | c.1027G>A   | p.A343T   | 0.19 | -                | -               |
| 47 | <i>SFI1</i>     | NM_00125832<br>6 | c.982C>T    | p.H328Y   | 0.31 | -                | -               |
| 47 | <i>SLC26A9</i>  | NM_052934        | c.1634T>A   | p.I545N   | 0.23 | -                | -               |
| 47 | <i>SORCS1</i>   | NM_052918        | c.2058+1G>A | (exon 15) | 0.25 | -                | -               |
| 47 | <i>TMEM132E</i> | NM_00130443<br>8 | c.50C>T     | p.S17L    | 0.29 | -                | -               |
| 47 | <i>TP53</i>     | NM_00112611<br>5 | c.128G>A    | p.R43H    | 0.4  | RCV00016106<br>5 | COSM335599<br>4 |
| 47 | <i>TPM2</i>     | NM_003289        | c.773-1->C  | (exon 9)  | 0.18 | -                | -               |
| 47 | <i>TUBGCP6</i>  | NM_020461        | c.3463C>T   | p.R1155W  | 0.09 | -                | -               |
| 47 | <i>ZIC3</i>     | NM_003413        | c.68G>A     | p.R23H    | 0.08 | -                | -               |
| 47 | <i>ZNF208</i>   | NM_007153        | c.205G>A    | p.E69K    | 0.22 | -                | -               |
| 47 | <i>ZNF787</i>   | NM_00100283<br>6 | c.508C>T    | p.R170C   | 0.4  | -                | -               |
| 47 | <i>ZNF831</i>   | NM_178457        | c.1100C>T   | p.S367L   | 0.13 | -                | -               |
| 48 | <i>ICT1</i>     | NM_00130326<br>5 | c.158A>C    | p.Q53P    | 0.07 | -                | -               |

59

60

**Table S5. Summary of possible driver mutations identified in this study**

| UPN | Gene              | Reference    | Nucleic acid change | Amino acid change | VAF  | ClinVar      | COSMIC      |
|-----|-------------------|--------------|---------------------|-------------------|------|--------------|-------------|
| 1   | <i>GAS6-FOXA1</i> | -            | -                   | (fusion gene)     | 0.10 | -            | -           |
| 2   | <i>FOXA1</i>      | NM_001310135 | g.38064406G>A       | (promoter)        | 0.21 | -            | -           |
| 2   | <i>HIST1H2BC</i>  | NM_003526    | c.72G>C             | p.K24N            | 0.20 | -            | -           |
| 2   | <i>PIK3CA</i>     | NM_006218    | c.241G>A            | p.E81K            | 0.28 | -            | COSM271871  |
| 3   | <i>FOXA1</i>      | NM_001310135 | g.38064406G>A       | (promoter)        | 0.08 | -            | -           |
| 3   | <i>PIK3CA</i>     | NM_006218    | c.2176G>A           | p.E726K           | 0.20 | VCV000376476 | COSM446019  |
| 5   | <i>PIK3CA</i>     | NM_006218    | c.3019G>C           | p.G1007R          | 0.09 | -            | COSM17443   |
| 6   | <i>FOXA1</i>      | NM_001310135 | g.38064406G>T       | (promoter)        | 0.01 | -            | -           |
| 8   | <i>FOXA1</i>      | NM_001310135 | g.38064406G>A       | (promoter)        | 0.01 | -            | -           |
| 14  | <i>FOXA1</i>      | NM_001310135 | g.38064406G>A       | (promoter)        | 0.01 | -            | -           |
| 14  | <i>HIST1H2BB</i>  | NM_021062    | c.72G>C             | p.K24N            | 0.19 | -            | COSM1169071 |
| 14  | <i>PIK3CA</i>     | NM_006218    | c.1633G>A           | p.E545K           | 0.21 | RCV000014631 | COSM763     |
| 14  | <i>PIK3CA</i>     | NM_006218    | c.3172A>C           | p.I1058L          | 0.15 | -            | COSM479744  |
| 14  | <i>SMARCB1</i>    | NM_003073    | c.744_745insCCCA    | p.D251Hfs*31      | 0.37 | -            | -           |
| 17  | <i>PIK3CA</i>     | NM_006218    | c.1624G>C           | p.E542Q           | 0.08 | -            | COSM17442   |
| 18  | <i>FOXA1</i>      | NM_001310135 | g.38064406G>A       | (promoter)        | 0.29 | -            | -           |
| 19  | <i>PIK3CA</i>     | NM_006218    | c.1637A>G           | p.Q546R           | 0.13 | RCV000038672 | COSM12459   |
| 25  | <i>FOXA1</i>      | NM_001310135 | g.38064406G>A       | (promoter)        | 0.03 | -            | -           |
| 35  | <i>FOXA1</i>      | NM_001310135 | g.38064406G>A       | (promoter)        | 0.05 | -            | -           |
| 40  | <i>CUX1</i>       | NM_001202543 | c.2893G>T           | p.E965X           | 0.21 | -            | -           |
| 40  | <i>EP300</i>      | NM_001429    | c.3798G>A           | p.W1266X          | 0.37 | -            | -           |
| 41  | <i>ERBB2</i>      | NM_001289937 | c.929C>T            | p.S310F           | 0.11 | -            | COSM48358   |
| 44  | <i>TP53</i>       | NM_000546    | c.827_830delCCTG    | p.A276Vfs*68      | 0.11 | -            | -           |
| 46  | <i>FOXA1</i>      | NM_001310135 | g.38064406G>A       | (promoter)        | 0.04 | -            | -           |
| 47  | <i>TP53</i>       | NM_001126115 | c.128G>A            | p.R43H            | 0.4  | RCV000161065 | COSM3355994 |
| 48  | <i>FOXA1</i>      | NM_001310135 | g.38064406G>A       | (promoter)        | 0.01 | -            | -           |

**Table S6. Top 200 differentially expressed genes**

| Gene             | baseMean | Log2 fold change | adjusted p-value | FOXA1 target | FOXA1 pathway | Keratin family |
|------------------|----------|------------------|------------------|--------------|---------------|----------------|
| <i>MLPH</i>      | 6291.8   | 3.59             | 3.2E-147         |              |               |                |
| <i>TSPAN1</i>    | 8694.4   | 6.38             | 1.2E-75          |              |               |                |
| <i>TMPRSS11D</i> | 2394.2   | 7.92             | 5.6E-68          |              |               |                |
| <i>ANO7</i>      | 2972.0   | 7.61             | 5.2E-65          |              |               |                |
| <i>KRT2</i>      | 152699.4 | -12.53           | 1.0E-56          |              |               | Y              |
| <i>GPX2</i>      | 2051.1   | 3.42             | 5.3E-55          |              |               |                |
| <i>MEF2A</i>     | 3745.1   | -1.98            | 4.4E-53          |              |               |                |
| <i>PRR15</i>     | 1815.5   | 6.53             | 1.0E-52          |              |               |                |
| <i>ABCC11</i>    | 2896.6   | 8.88             | 1.3E-51          |              |               |                |
| <i>SOS2</i>      | 2029.9   | -1.34            | 4.3E-51          |              |               |                |
| <i>SEC14L2</i>   | 3122.7   | 3.46             | 4.5E-51          |              |               |                |
| <i>HHIPL2</i>    | 647.6    | 7.81             | 9.3E-49          |              |               |                |
| <i>FGFR4</i>     | 4917.3   | 6.33             | 8.7E-47          |              |               |                |
| <i>RHCG</i>      | 7665.3   | 5.16             | 1.8E-46          |              |               |                |
| <i>KMO</i>       | 288.8    | 5.44             | 9.5E-46          |              |               |                |
| <i>MUC5AC</i>    | 9131.8   | 14.97            | 2.2E-44          |              |               |                |
| <i>STXBP5</i>    | 2264.0   | -1.57            | 1.0E-43          |              |               |                |
| <i>GAL3ST2</i>   | 349.4    | 7.11             | 5.3E-42          |              |               |                |
| <i>TMEM132A</i>  | 8050.6   | 4.67             | 7.6E-42          |              |               |                |
| <i>SPDEF</i>     | 6669.8   | 4.75             | 1.1E-40          | Y            |               |                |
| <i>JAK2</i>      | 1150.8   | -1.87            | 3.0E-40          |              |               |                |
| <i>PGD</i>       | 4916.6   | 1.91             | 6.0E-40          |              |               |                |
| <i>NETO2</i>     | 717.7    | 4.19             | 1.8E-39          |              |               |                |
| <i>VSIG2</i>     | 1890.2   | 5.64             | 3.9E-39          | Y            |               |                |
| <i>CAPN9</i>     | 1374.6   | 8.93             | 5.1E-39          |              |               |                |
| <i>FUT3</i>      | 1316.4   | 4.62             | 9.8E-39          |              |               |                |
| <i>NRK</i>       | 504.4    | 4.96             | 1.0E-37          |              |               |                |
| <i>PTHLH</i>     | 3723.3   | 7.46             | 2.7E-37          |              |               |                |
| <i>ANKRD12</i>   | 4283.4   | -1.77            | 1.5E-36          |              |               |                |
| <i>SYT8</i>      | 2227.0   | -5.27            | 1.6E-35          |              |               |                |
| <i>SYNE4</i>     | 291.5    | 3.09             | 1.9E-35          |              |               |                |
| <i>FOXA3</i>     | 1377.8   | 10.44            | 2.0E-35          |              | Y             |                |
| <i>LRP4</i>      | 3358.7   | -3.41            | 3.8E-35          |              |               |                |
| <i>BAALC</i>     | 1241.3   | 4.15             | 6.7E-35          |              |               |                |
| <i>PGAP1</i>     | 1509.0   | -2.22            | 1.2E-34          |              |               |                |
| <i>SEPT10</i>    | 2239.2   | -1.28            | 4.8E-34          |              |               |                |
| <i>YIF1B</i>     | 1907.5   | 1.33             | 1.1E-33          |              |               |                |
| <i>TFF1</i>      | 3927.8   | 15.44            | 2.1E-33          |              | Y             |                |

|              |         |       |         |   |
|--------------|---------|-------|---------|---|
| CAPN8        | 961.7   | 5.15  | 6.1E-33 |   |
| SLC44A4      | 3451.5  | 5.08  | 1.2E-32 |   |
| SPRR1A       | 26589.6 | 5.28  | 5.1E-32 |   |
| ZNF593       | 1131.7  | 1.82  | 7.6E-32 |   |
| PDK3         | 2532.0  | -2.49 | 8.1E-32 |   |
| KRT6A        | 88088.3 | 5.13  | 1.0E-31 | Y |
| GJB2         | 45826.9 | 3.76  | 3.1E-31 |   |
| KRT8         | 14812.9 | 4.20  | 7.1E-31 | Y |
| KIAA1328     | 228.7   | -1.58 | 1.1E-30 |   |
| CNDP2        | 7070.2  | 1.47  | 1.3E-30 |   |
| ERP27        | 489.3   | 3.04  | 3.0E-30 |   |
| LOC101929613 | 465.0   | 8.20  | 3.3E-30 |   |
| HBA1         | 175.5   | -5.15 | 4.2E-30 |   |
| ANTXR1       | 4727.9  | -2.74 | 7.7E-30 |   |
| ARRDC1       | 4439.7  | 2.09  | 4.2E-29 |   |
| GSTP1        | 37241.3 | 2.13  | 6.9E-29 |   |
| DST          | 24044.7 | -1.69 | 7.0E-29 |   |
| TBC1D30      | 376.9   | 3.14  | 8.6E-29 |   |
| STRA6        | 1211.6  | 7.93  | 8.8E-29 |   |
| KRBA1        | 1154.2  | 1.52  | 1.0E-28 |   |
| LRRC31       | 305.9   | 8.21  | 1.0E-28 |   |
| ABCG4        | 654.2   | 5.68  | 7.5E-28 |   |
| PNMT         | 926.4   | 6.58  | 1.4E-27 |   |
| ASL          | 1303.0  | 1.52  | 1.8E-27 |   |
| CDKL1        | 202.4   | -1.60 | 3.7E-27 |   |
| KIAA2026     | 1909.1  | -1.15 | 4.0E-27 |   |
| AGR2         | 7079.3  | 6.04  | 4.3E-27 |   |
| RGMB         | 1959.2  | -2.10 | 4.3E-27 |   |
| HDAC1        | 4293.1  | 1.10  | 5.0E-27 |   |
| CDON         | 2126.9  | -3.22 | 5.2E-27 |   |
| CCDC103      | 97.3    | 2.54  | 5.2E-27 |   |
| EPHB1        | 241.5   | -4.64 | 5.2E-27 |   |
| SPRY1        | 1088.7  | -2.39 | 5.2E-27 | Y |
| QKI          | 3722.9  | -1.59 | 6.3E-27 |   |
| FOXA1        | 3816.5  | 4.22  | 9.7E-27 | Y |
| COA3         | 2114.4  | 1.26  | 1.0E-26 |   |
| PCGF5        | 1751.2  | -2.34 | 1.0E-26 |   |
| AKR7A3       | 397.6   | 4.39  | 2.2E-26 |   |
| CXCL17       | 334.3   | 6.60  | 2.3E-26 |   |
| POLD4        | 3714.0  | 1.83  | 2.9E-26 | Y |
| MBNL1        | 5910.3  | -1.26 | 3.0E-26 |   |
| VSIG1        | 959.5   | 5.51  | 3.5E-26 |   |

|                   |         |        |         |   |
|-------------------|---------|--------|---------|---|
| <i>GNB4</i>       | 4613.4  | -2.42  | 3.7E-26 |   |
| <i>B4GALNT2</i>   | 2949.3  | 6.99   | 4.3E-26 |   |
| <i>CEACAM6</i>    | 20151.5 | 4.52   | 7.0E-26 |   |
| <i>AEN</i>        | 1637.2  | 1.72   | 2.1E-25 |   |
| <i>ISG20</i>      | 1457.6  | 3.34   | 2.5E-25 |   |
| <i>FOXP2</i>      | 344.8   | -3.21  | 2.7E-25 | Y |
| <i>EFHD1</i>      | 3316.0  | 3.84   | 2.9E-25 |   |
| <i>MAT1A</i>      | 115.4   | -5.73  | 3.4E-25 |   |
| <i>GBP6</i>       | 2157.5  | 4.46   | 4.0E-25 |   |
| <i>ST6GALNAC1</i> | 355.0   | 3.40   | 5.4E-25 |   |
| <i>MBOAT7</i>     | 3696.0  | 1.23   | 5.5E-25 |   |
| <i>AP1M2</i>      | 3390.2  | 1.42   | 5.7E-25 |   |
| <i>CYP2S1</i>     | 929.3   | 2.00   | 5.9E-25 |   |
| <i>TNNI2</i>      | 431.1   | -7.06  | 9.2E-25 |   |
| <i>PJA2</i>       | 4666.1  | -1.12  | 1.2E-24 |   |
| <i>SMIM22</i>     | 857.8   | 4.15   | 1.7E-24 |   |
| <i>MUC7</i>       | 243.3   | -11.56 | 1.7E-24 |   |
| <i>SOCS5</i>      | 1092.9  | -1.04  | 2.0E-24 |   |
| <i>KRT19</i>      | 47366.4 | 4.40   | 2.2E-24 | Y |
| <i>FAM122A</i>    | 973.4   | -0.81  | 2.3E-24 | Y |
| <i>CLN3</i>       | 2730.3  | 1.30   | 2.3E-24 |   |
| <i>TIMM8B</i>     | 1504.4  | 1.66   | 4.7E-24 |   |
| <i>SWI5</i>       | 525.3   | 1.12   | 5.0E-24 |   |
| <i>KYNU</i>       | 1437.2  | 4.38   | 5.4E-24 |   |
| <i>LDLRAD1</i>    | 166.0   | 6.12   | 6.3E-24 |   |
| <i>CYB561D2</i>   | 756.9   | 1.58   | 9.6E-24 |   |
| <i>MIR31HG</i>    | 105.8   | 6.81   | 1.1E-23 |   |
| <i>CAV2</i>       | 2831.8  | -1.84  | 1.2E-23 |   |
| <i>CTDSPL</i>     | 3717.1  | -1.65  | 1.9E-23 |   |
| <i>JADE1</i>      | 993.4   | -2.11  | 2.4E-23 | Y |
| <i>TUFM</i>       | 8269.6  | 1.17   | 2.4E-23 |   |
| <i>KLK13</i>      | 6683.4  | 4.52   | 3.2E-23 |   |
| <i>NR3C1</i>      | 3242.5  | -2.03  | 3.2E-23 |   |
| <i>WDR47</i>      | 2324.4  | -1.20  | 3.5E-23 |   |
| <i>FER</i>        | 1301.5  | -1.08  | 3.7E-23 |   |
| <i>TRIM16</i>     | 2332.3  | 1.80   | 5.0E-23 |   |
| <i>BIK</i>        | 452.2   | 2.80   | 5.2E-23 |   |
| <i>LSM11</i>      | 307.4   | -1.39  | 5.4E-23 |   |
| <i>ZNF654</i>     | 816.8   | -1.10  | 6.5E-23 |   |
| <i>SNRNP35</i>    | 1345.2  | 1.00   | 8.8E-23 |   |
| <i>CSTA</i>       | 44252.8 | 2.89   | 9.2E-23 |   |
| <i>DDX39A</i>     | 2878.3  | 1.36   | 9.3E-23 |   |

|           |          |       |         |   |   |
|-----------|----------|-------|---------|---|---|
| TOX3      | 730.9    | 4.39  | 1.1E-22 |   |   |
| AFP       | 625.6    | 11.63 | 1.1E-22 |   |   |
| USP12     | 1629.5   | -1.25 | 1.3E-22 |   |   |
| SNTB2     | 1707.3   | -1.34 | 1.5E-22 |   |   |
| HSP90AB1  | 20619.7  | 0.79  | 2.4E-22 |   |   |
| NFIX      | 11628.3  | -2.05 | 2.7E-22 |   |   |
| ABCC1     | 5427.2   | 1.50  | 4.3E-22 |   |   |
| FARSA     | 3609.3   | 1.07  | 4.3E-22 |   |   |
| LINC00514 | 200.0    | 7.46  | 4.6E-22 |   |   |
| SOX11     | 651.4    | 7.26  | 4.7E-22 |   |   |
| MKLN1     | 2712.7   | -1.00 | 4.7E-22 |   |   |
| TFAP2B    | 6897.3   | 3.36  | 6.1E-22 |   |   |
| DENND4C   | 3647.5   | -1.59 | 6.6E-22 |   |   |
| CXCL14    | 28129.5  | -2.26 | 7.8E-22 |   |   |
| ETV6      | 1958.7   | -1.34 | 7.8E-22 |   |   |
| HM13      | 4588.3   | 1.34  | 8.1E-22 |   |   |
| LPIN1     | 775.7    | -1.91 | 8.1E-22 |   |   |
| HID1      | 3461.8   | 2.96  | 9.5E-22 | Y |   |
| B9D1      | 421.0    | 1.82  | 9.7E-22 |   |   |
| KRT18     | 3956.5   | 3.56  | 1.0E-21 |   | Y |
| OGFRL1    | 931.5    | -1.80 | 1.1E-21 |   |   |
| SLC9A3R1  | 11639.6  | 2.70  | 1.4E-21 | Y |   |
| NPW       | 3371.2   | 7.23  | 1.6E-21 |   |   |
| BCAS1     | 1630.9   | 3.72  | 1.8E-21 | Y |   |
| ALDOA     | 36527.7  | 1.26  | 1.9E-21 |   |   |
| HMGB3     | 1136.6   | 1.91  | 1.9E-21 |   |   |
| SMPDL3B   | 468.2    | 3.75  | 1.9E-21 |   |   |
| CDHR1     | 12616.3  | -3.78 | 1.9E-21 |   |   |
| SCAND1    | 2996.2   | 1.40  | 1.9E-21 |   |   |
| DYNC111   | 73.4     | -4.68 | 2.1E-21 |   |   |
| SERPINB3  | 30391.2  | 5.83  | 2.6E-21 |   |   |
| CNGB1     | 116.0    | 6.74  | 2.6E-21 |   |   |
| TNFRSF21  | 2297.2   | 1.73  | 2.8E-21 |   |   |
| TMEM208   | 1784.5   | 1.35  | 3.0E-21 | Y |   |
| RPL7      | 457.1    | -1.87 | 3.1E-21 |   |   |
| MRPL12    | 3375.2   | 1.65  | 3.1E-21 |   |   |
| KRT17     | 123592.3 | 5.21  | 4.1E-21 | Y | Y |
| CXCL6     | 953.1    | 11.33 | 4.5E-21 |   |   |
| FAM175A   | 274.0    | -1.84 | 5.3E-21 |   |   |
| MANF      | 3643.8   | 1.67  | 5.7E-21 |   |   |
| JOSD2     | 1264.5   | 1.10  | 7.0E-21 |   |   |
| PRSS27    | 2325.6   | 4.17  | 7.0E-21 |   |   |

|                   |         |       |         |   |
|-------------------|---------|-------|---------|---|
| <i>FAM177B</i>    | 428.7   | 8.54  | 7.7E-21 |   |
| <i>SPRR1B</i>     | 56743.8 | 4.15  | 8.4E-21 |   |
| <i>ELK4</i>       | 2680.5  | -1.25 | 8.4E-21 |   |
| <i>ZBTB33</i>     | 2119.2  | -1.48 | 9.5E-21 |   |
| <i>SMAD5</i>      | 3665.5  | -1.20 | 9.7E-21 | Y |
| <i>HMGCS2</i>     | 8114.4  | 4.49  | 1.0E-20 |   |
| <i>CCT3</i>       | 9891.2  | 0.92  | 1.1E-20 |   |
| <i>ARHGAP31</i>   | 1436.3  | -2.25 | 1.1E-20 |   |
| <i>MAML2</i>      | 906.0   | -2.69 | 1.2E-20 |   |
| <i>MRPS33</i>     | 1246.5  | 1.16  | 1.2E-20 |   |
| <i>RAB30</i>      | 707.9   | -2.06 | 1.3E-20 |   |
| <i>SLC25A39</i>   | 6605.8  | 1.28  | 1.3E-20 |   |
| <i>GNG12</i>      | 9709.2  | -1.17 | 1.4E-20 |   |
| <i>KRT16</i>      | 63038.5 | 5.27  | 1.5E-20 | Y |
| <i>PYCR1</i>      | 2667.7  | 3.32  | 1.6E-20 |   |
| <i>SNRNP25</i>    | 903.0   | 1.38  | 1.6E-20 |   |
| <i>ATP13A1</i>    | 4315.1  | 1.01  | 1.9E-20 |   |
| <i>PXK</i>        | 615.3   | -1.68 | 3.0E-20 |   |
| <i>HIST1H2BH</i>  | 38.9    | 2.64  | 3.2E-20 |   |
| <i>RSBN1</i>      | 914.0   | -1.36 | 3.4E-20 |   |
| <i>C9orf116</i>   | 117.3   | 2.93  | 3.7E-20 |   |
| <i>H2AFX</i>      | 2146.6  | 1.65  | 4.3E-20 |   |
| <i>PRKAB2</i>     | 1397.2  | -1.54 | 4.7E-20 |   |
| <i>ATP7B</i>      | 1375.0  | 3.32  | 9.2E-20 |   |
| <i>PAX9</i>       | 355.6   | 4.57  | 9.8E-20 |   |
| <i>CCDC167</i>    | 373.0   | 1.75  | 1.2E-19 |   |
| <i>LBX2</i>       | 55.7    | 4.31  | 1.2E-19 |   |
| <i>CAPN13</i>     | 515.0   | 5.41  | 1.4E-19 |   |
| <i>AKAP11</i>     | 2649.5  | -1.12 | 1.6E-19 |   |
| <i>ERVMER34-1</i> | 156.1   | 3.04  | 1.7E-19 |   |
| <i>SLC26A2</i>    | 1874.4  | -3.36 | 2.0E-19 |   |
| <i>KPNA2</i>      | 2185.7  | 2.25  | 2.0E-19 |   |
| <i>DSTYK</i>      | 1977.5  | -1.30 | 2.4E-19 |   |
| <i>ALAS1</i>      | 3561.0  | 1.61  | 2.5E-19 |   |
| <i>GABRP</i>      | 708.4   | -5.31 | 2.6E-19 |   |
| <i>SMAGP</i>      | 1552.4  | 1.48  | 2.8E-19 |   |

66 Positive Log<sub>2</sub> fold change values indicate upregulation in patient samples. Y, yes

67
